# 1 **Single-cell atlas of the first intra-mammalian developmental stage** 2 **of the human parasite *Schistosoma mansoni***

3

4 Carmen Lidia Diaz Soria<sup>1#</sup>, Jayhun Lee<sup>2#</sup>, Tracy Chong<sup>2,3</sup>, Avril Coghlan<sup>1</sup>, Alan Tracey<sup>1</sup>,  
5 Matthew D Young<sup>1</sup>, Tallulah Andrews<sup>1</sup>, Christopher Hall<sup>1</sup>, Bee Ling Ng<sup>1</sup>, Kate Rawlinson<sup>1</sup>,  
6 Stephen R. Doyle<sup>1</sup>, Steven Leonard<sup>1</sup>, Zhigang Lu<sup>1</sup>, Hayley M Bennett<sup>1</sup>, Gabriel Rinaldi<sup>1\*</sup>,  
7 Phillip A. Newmark<sup>2,3\*</sup>, Matthew Berriman<sup>1\*</sup>.

## 8 **Affiliations**

9 *1 Wellcome Sanger Institute, Wellcome Genome Campus, Hinxton, Cambridgeshire, UK*

10 *2 Regenerative Biology, Morgridge Institute for Research, Madison, WI, USA*

11 *3 Howard Hughes Medical Institute, Department of Integrative Biology, University of*  
12 *Wisconsin-Madison, Madison, WI, USA*

13 #Equal contribution: Carmen L. Diaz Soria, Jayhun Lee

14 \*Co-corresponding authors: Gabriel Rinaldi ([gr10@sanger.ac.uk](mailto:gr10@sanger.ac.uk)), Phillip A. Newmark  
15 ([PNewmark@morgridge.org](mailto:PNewmark@morgridge.org)), and Matthew Berriman ([mb4@sanger.ac.uk](mailto:mb4@sanger.ac.uk))

16

## 17 **Abstract**

18 Over 250 million people suffer from schistosomiasis, a tropical disease caused by parasitic  
19 flatworms known as schistosomes. Humans become infected by free-swimming, water-borne  
20 larvae, which penetrate the skin. The earliest intra-mammalian stage, called the  
21 schistosomulum, undergoes a series of developmental transitions. These changes are critical  
22 for the parasite to adapt to its new environment as it navigates through host tissues to reach its  
23 niche, where it will grow to reproductive maturity. Unravelling the mechanisms that drive  
24 intra-mammalian development requires knowledge of the spatial organisation and  
25 transcriptional dynamics of different cell types that comprise the schistomulum body. To fill  
26 these important knowledge gaps, we performed single-cell RNA sequencing on two-day old  
27 schistosomula of *Schistosoma mansoni*. We identified likely gene expression profiles for  
28 muscle, nervous system, tegument, parenchymal/primordial gut cells, and stem cells. In

29 addition, we validated cell markers for all these clusters by *in situ* hybridisation in  
30 schistosomula and adult parasites. Taken together, this study provides a comprehensive cell-  
31 type atlas for the early intra-mammalian stage of this devastating metazoan parasite.

32

## 33 **Introduction**

34 Schistosomes are parasitic flatworms that cause schistosomiasis, a serious, disabling, and  
35 neglected tropical disease (NTD). More than 250 million people require treatment each year,  
36 particularly in Africa<sup>1</sup>. The life cycle of this metazoan parasite is complex. A schistosome egg  
37 hatches in water to release a free-living, invasive larva that develops into asexually replicating  
38 forms within aquatic snails (the intermediate host). From the snail, thousands of cercariae –a  
39 second free-living larval form– are released into freshwater to find and invade a mammal (the  
40 definitive host). In the mammalian host, the larvae (schistosomula) migrate and develop into  
41 distinctive male or female adult worms<sup>2</sup> (Figure 1A). While the only drug currently available  
42 to treat schistosomiasis (praziquantel) works efficiently to kill adult parasites, it is less effective  
43 against immature parasites including schistosomula<sup>3</sup>. Understanding the parasite biology is a  
44 critically important step for developing novel strategies to treat and control this NTD.

45 During invasion, the parasite undergoes a major physiological and morphological  
46 transformation from the free-living, highly motile cercariae to the adult parasitic form<sup>2</sup>. Upon  
47 penetration, the tail used for swimming is lost. Less than three hours after entering the host, the  
48 thick glycocalyx is removed and the tegument is remodelled to serve both nutrient-absorption  
49 and immune-protection roles<sup>4</sup>. Throughout the rest of the organism's life in the definitive host,  
50 a population of sub-tegumental progenitor cells continuously replenish the tegument, allowing  
51 the parasite to survive for decades<sup>5,6</sup>. The schistosomula make their way into blood or  
52 lymphatic vessels and, one week after infection, reach the lung capillaries<sup>7</sup>. The migration  
53 through the lung requires coordinated neuromuscular activities, including cycles of muscle  
54 elongation and contraction<sup>8</sup>, to squeeze through capillaries and reach the general circulation<sup>7</sup>.  
55 Over the following weeks, the parasites mature further into sexually reproducing adults.  
56 Dramatic changes to the parasite are required that include posterior growth, remodelling of the  
57 musculature<sup>9</sup> and nervous system<sup>10,11</sup> as well as the development of the gonads<sup>12</sup> and gut<sup>13</sup>.  
58 This extensive tissue development starts in the schistosomula, with stem cells driving these  
59 transitions<sup>6,14,15</sup>. However, to decipher cellular and molecular mechanisms underlying

60 schistosomula development, a detailed understanding of the spatial organisation and  
61 transcriptional programs of individual cells are needed.

62 Important insights into major processes that underlie the transformations across the life cycle  
63 have been gained from bulk transcriptomic studies<sup>5,6,14-24</sup>. However, these studies are not able  
64 to quantify the relative abundance of different cell types from the absolute expression per cell,  
65 and the signal from highly expressed genes in a minority of cells can often be masked by a  
66 population averaging effect. Single-cell RNA sequencing has previously been used  
67 successfully to characterise cell types<sup>25-32</sup> and understand how the cell expression profile  
68 changes during differentiation<sup>31-38</sup>. Notable examples include recent studies in the free-living  
69 planarian flatworm *Schmidtea mediterranea*<sup>31,32,39</sup>, a well-established model to study  
70 regeneration in the Phylum Platyhelminthes<sup>40</sup>.

71 Here, we have used scRNAseq to characterise two-day schistosomula obtained by *in vitro*  
72 transformation of cercariae<sup>22</sup> using 10X Chromium technology and validated the cell clusters  
73 by RNA *in situ* hybridization (ISH) in schistosomula and adult worms. We identified eleven  
74 discrete cell populations, and described and validated novel marker genes for muscles, nervous  
75 system, tegument, parenchymal/gut primordia and stem cells. This study lays the foundation  
76 towards a greater understanding of cell types and tissue differentiation in the first intra-  
77 mammalian developmental stage of this NTD pathogen.

78

## 79 **Results**

### 80 **Identification of 11 transcriptionally distinct cell types in schistosomula.**

81 We performed single-cell RNA sequencing of schistosomula collected two days after  
82 mechanically detaching the tail from free-living motile larvae (cercariae) (Figure 1A). To do  
83 so, we first developed a protocol to efficiently dissociate the parasites using a protease cocktail,  
84 after which individual live cells were collected using fluorescence-activated cell sorting  
85 (FACS) (Figure 1A and Supplementary Figure 1A). Using the droplet-based 10X Genomics  
86 Chromium platform, we generated transcriptome-sequencing data from a total of 3,513 larval  
87 cells, of which 2,144 passed strict quality-control filters, resulting in a median of 900 genes  
88 and depth of 283,000 reads per cell (Table S1). Given that an individual schistosomulum  
89 comprises ~900 cells (Supplementary Figure 1B), the number of quality-controlled cells  
90 theoretically represents >2x coverage of all cells in the organism at this developmental stage.

91 To create a cellular map of the *S. mansoni* schistosomula, we used a combination of the SC3<sup>41</sup>,  
92 Seurat<sup>42</sup> and UMAP<sup>43</sup> algorithms to cluster cells based on their mRNA expression levels and  
93 statistically identify marker genes that were best able to discriminate between the clusters  
94 (Figures 1B and 1C, Table S2-S5). To identify which cells each cluster represented, we curated  
95 gene set lists of previously defined cell-specific markers (Table S6). For example,  
96 tegument<sup>5,6,44-46</sup> and stem<sup>14,47-49</sup> cell clusters were identified based on known marker genes in  
97 *S. mansoni*, whereas muscle cells<sup>50-52</sup> and neurons<sup>53-55</sup> were identified based on characterised  
98 marker genes in mouse and humans (Table S6). Based on the marker genes identified using  
99 Seurat, we identified three distinct muscle-like clusters composed of 1,105 cells, two apparent  
100 tegumental clusters (253 cells), two parenchymal clusters (155 cells), one cluster resembling  
101 stem cells (94), three resembling the nervous system (311 cells), and one ambiguous cluster of  
102 226 cells that could not be experimentally defined. Gene Ontology (GO) analysis of the marker  
103 genes generally matched the predicted cellular processes for each cluster (Supplementary  
104 Figure 1C). For instance, as expected, the stem/germinal cell cluster showed a significant  
105 enrichment in genes involved in translation, DNA replication, and RNA binding. Meanwhile,  
106 neuronal cells and muscle cells were enriched in processes involved in GPCR signalling and  
107 cytoskeleton, respectively. These analyses suggested that each cluster is molecularly distinct  
108 and likely display different biological functions. Therefore, we defined highly specific cluster-

109 defining transcripts (potential cell markers) and characterised their spatial expression in both  
110 larval schistosomula and adult schistosomes by ISH (Table S7).

### 111 **Muscle cells show position dependent patterns of expression**

112 Three discrete muscle clusters were identified by examining the expression of the well-  
113 described muscle-specific genes myosin<sup>56</sup> and troponin<sup>52</sup> (Figure 2A). One muscle cluster  
114 showed high expression of the uncharacterised gene Smp\_161510, which was expressed along  
115 the dorso-ventral axis of two-day old schistosomula (Figure 2B). In adult worms, Smp\_161510  
116 exhibited no dorsal-ventral expression pattern; instead, Smp\_161510 expression was scattered  
117 throughout the worm body (Supplementary Figures 2A and 2B). A subset of cells in this muscle  
118 cluster expressed *wnt* (Smp\_167140) (Figure 2A). These *wnt*<sup>+</sup> cells showed an anterior-  
119 posterior gradient in two-day schistosomula (Figure 2C) that remained consistent during the  
120 development from juveniles to mature adult worms (Figure 2D and Supplementary Figure 2A).  
121 Given that these markers have been shown to have distinct spatial distributions<sup>57,58</sup>, we decided  
122 to term this population ‘positional muscle’.

123 A second muscle-like cluster was uniquely found to express genes encoding a rhodopsin  
124 orphan GPCR (Smp\_153210) (Figure 2E) and an ortholog of the myoD transcription factor  
125 (Smp\_167400) from *S. mediterranea* (dd\_Smed\_v6\_12634\_0\_1)<sup>31</sup>. Both genes showed a  
126 scattered expression pattern throughout the schistosomula (Figure 2E), and adult body (Figure  
127 2F, Supplementary Figure 2B).

128 Finally, the third cluster of putative muscle cells was shown to be enriched in *actin-2*  
129 (Smp\_307020, Smp\_307010) expression. FISH confirmed *actin-2* expression throughout the  
130 body of the schistosomula (Figure 2A). Our transcriptomic data suggested that *actin-2* was  
131 enriched but not specific to this cluster. In line with the transcriptome evidence, ISH revealed  
132 that *actin-2* is also expressed in some cells of both the ‘positional muscle’ and *myoD*<sup>+</sup>  
133 populations in schistosomula (Figures 2C, 2E-F) and in adults (Supplementary Figure 2C).  
134 Together, we identified three transcriptionally distinct cell types validated by ISH that  
135 represent schistosomula muscle cells (Figure 2H).

### 136 **Schistosomula have two distinct populations of tegumental cells**

137 We identified two populations of tegumental cells (Tegument 1 and Tegument 2, Figure 3A).  
138 The first tegumental cluster (Tegument 1) expressed several known tegument genes, including

139 four that distinguish it from Tegument 2 and encode: Fimbrin (Smp\_037230), TAL10  
140 (Smp\_074460), Annexin B2 (Smp\_077720) and Sm21.7 (Smp\_086480) (Figure 3A; Table  
141 S6)<sup>6,45,46,59</sup>.

142 The tegument 1 population also showed enrichment for an uncharacterised gene (Smp\_022450)  
143 that, to our knowledge, has not previously been reported as a tegument-associated gene. We  
144 found that cells in the head, neck and body of the schistosomulum that expressed Smp\_022450  
145 co-localised with the tegument marker *annexin B2* (Smp\_077720) (Figure 3B). In addition,  
146 cells expressing *annexin B2* and Smp\_022450 were dextran<sup>+</sup> (Figure 3C, Supplementary  
147 Figure 3A). Fluorescently conjugated dextran specifically labels tegumental cell bodies<sup>6</sup>, thus  
148 further validating Smp\_022450 as a tegumental marker. In addition, Tegument 1 showed  
149 enrichment for microexon genes *meg3* (Smp\_138070) and *meg17* (Smp\_180620). The  
150 microexon gene *meg3* co-localised with the novel tegument gene Smp\_022450 in the neck and  
151 anterior region of the larva (Figure 3D). The gene *meg17* was expressed in the neck and  
152 oesophageal region (Figure 3E). Given the expression of some *meg* genes in the oesophagus of  
153 adult male and female parasites<sup>60</sup> and the developmental relationship between the oesophagus  
154 and the tegument<sup>8,61</sup>, we tested if *meg17* co-localised with any known oesophageal marker. We  
155 found that cells expressing *meg17* also expressed the known oesophageal marker *meg4*<sup>62</sup>  
156 (Smp\_163630) (Figure 3E). These results suggest that a subset of Tegument 1 cells likely  
157 represent primordial oesophageal gland cells.

158 Distinguishing the second tegumental cluster was challenging due a lack of Tegument 2-  
159 specific markers (Figure 3A). Two genes – *ccdc74* (Smp\_030010) and *nmda* (Smp\_181470) –  
160 with similarly enriched expression in both clusters were selected for further investigation.  
161 Double FISH experiments using either *ccdc74* (Smp\_030010) or *nmda* (Smp\_181470) with  
162 Smp\_022450 showed co-localisation of expression (Figure 3F-G). In addition, these cells were  
163 also dextran<sup>+</sup><sup>6</sup>, confirming their tegumental assignment (Supplementary Figure 3B and 3C). In  
164 adults, marker genes of Tegument 1 and 2 showed overall similar enriched expression patterns  
165 in the anterior cell mass, ventral sucker, and tegumental cells throughout the worm body  
166 (Supplementary Figures 3D and 3E).

167 To explore more subtle differences in expression profiles between these two tegumental  
168 populations, we investigated tentative functional differences. Analysis of marker genes for  
169 Tegument 2 using the STRING database predicted a group of interacting genes involved in  
170 clathrin-mediated endocytosis<sup>63</sup> (Supplementary Figure 3F-3H). This group included genes

171 that encode Phosphatidylinositol-binding clathrin assembly protein (Smp\_152550), Epsin15-  
172 related (Smp\_171640) and Epsin4 (Smp\_140330) proteins. The potential involvement of  
173 Tegument 2 cells in calcium binding (Supplementary Figure 1C) and clathrin-mediated  
174 endocytosis is consistent with previous studies showing that numerous vesicles are produced  
175 by endocytosis from cell bodies and trafficked to the syncytial cytoplasm of the tegument<sup>64,65</sup>.  
176 Together, the evidence provided here supports these cells being part of the schistosomulum  
177 tegument (Figure 3H).

### 178 **Identification of schistosome parenchymal and primordial gut cells**

179 Schistosomes, like other platyhelminths, are acoelomates and lack a fluid-filled body cavity.  
180 Instead, their tissues are bound together by cells and extra-cellular matrix of the parenchyma<sup>20</sup>.  
181 We identified two cell types that most likely represent parenchymal cells (Parenchymal 1 and  
182 2) that showed enriched expression of numerous enzymes such as lysosome, peptidase, and  
183 cathepsin (Figure 4A).

184 Cells expressing *cathepsin B* (Smp\_141610) were spread throughout the worm parenchyma  
185 and showed long cytoplasmic processes stretching from each cell (Figure 4B-C and  
186 Supplementary Figure 4D-E). A similar expression profile was observed for *serpin*  
187 (Smp\_090080) expressing cells in the later stages of schistosomula as well as in adult parasites  
188 (Supplementary Figures 4A-4C). In addition, parenchymal cells did not co-express other cell  
189 type markers except for *actin-2*, which showed slightly overlap in expression (Supplementary  
190 4F, 4J).

191 In Parenchymal 2 cells, we found that *leucine aminopeptidase (lap)* (Smp\_030000) was  
192 expressed in the primordial gut (*cathepsin B*'(+)) and surrounding parenchymal tissue (Figure  
193 4D). Such mixed gut/parenchymal expression was also observed in adult parasites (Figure 4E,  
194 Supplementary Figure 4B). This is consistent with previous studies in adult parasites where  
195 LAP was detected in the gut and in cells surrounding the gut<sup>66</sup>. Overall, the identified genes  
196 that mark schistosomula parenchyma, while a few of them are also expressed in the gut  
197 primordia (Figure 4F).

### 198 **Stem cells in two day old schistosomula**

199 Recently, it was shown that schistosomula carry two types of stem cell populations: somatic  
200 stem cells and germinal cells<sup>15</sup>. The somatic stem cells are involved in somatic tissue

201 differentiation and homeostasis during the parasite intra-mammalian development, whereas the  
202 germinal cells are presumed to give rise to germ cells (sperm and oocytes) in adult parasites<sup>15</sup>.  
203 Less than 24 hours after the cercaria enters the mammalian host to become schistosomulum,  
204 ~5 somatic stem cells at distinct locations begin to proliferate<sup>15</sup> (Figure 5B). Germinal cells,  
205 on the other hand, are thought to be packaged in a distinct anatomical location called the  
206 germinal cell cluster, and only begin to proliferate ~ 1 week after penetrating the host<sup>15</sup>.

207 We identified a single stem/germinal cell cluster that expressed the canonical cell cycle  
208 markers *histone h2a* (Smp\_086860)<sup>15</sup> and *histone h2b* (Smp\_108390)<sup>6</sup> (Figure 5A). In  
209 addition, this cluster also had a significant enrichment of translational components  
210 (Supplementary Figure 1C). We confirmed that *histone h2a* (Smp\_086860) is expressed in ~5  
211 cells, 1 medial and 2 sets on each side (Figure 5B) and also in the germinal cell cluster a few  
212 days later (Supplementary Figure 5A). In adults, *histone h2a* (Smp\_086860) is expressed in  
213 somatic cells as well as in cells of the gonads (testis, ovary, and vitellaria) (Supplementary  
214 Figure 5B). In addition, we identified a novel stem/germ cell marker *calmodulin (cam)*  
215 (Smp\_032950). This gene was expressed similarly to *h2a*, but in some schistosomula, a few  
216 more *cam*<sup>+</sup> cells could be observed medially as well as near the germinal cell cluster (Figure  
217 5C). The *cam*<sup>+</sup> cells were also positive for *h2b* (Figure 5D), and found to be expressed in the  
218 adult gonads (Figure 5E) and in adult soma (Figure 5F).

219 In addition to *histone h2a* (Smp\_086860), *histone h2b* (Smp\_108390) and *cam* (Smp\_032950),  
220 cells in this cluster expressed stem cell markers including *fgfrA* (Smp\_175590) and *nanos-2*  
221 (Smp\_051920)<sup>14,15,67</sup> (Figure 5A). Given that many of these genes have been associated with  
222 two distinct stem cell populations<sup>15</sup> (somatic and germinal), we tested if these cells could be  
223 further subclustered, but were unable to do so, presumably due to the low expression level of  
224 some of these genes in most cells in this cluster (Supplementary Figure 5C). Overall, these data  
225 suggest that this cluster does indeed represent population(s) of stem cells that might give rise  
226 to somatic and germ cells during the course of parasite development within the mammalian  
227 host (Figure 5G).



## 228 **Heterogeneity in cells of the schistosomulum nervous system**

229 Platyhelminths have a central nervous system comprised of cephalic ganglia and main nerve  
230 cords, and a peripheral nervous system with minor nerve cords and plexuses<sup>10</sup>. This system  
231 also plays a neuroendocrine role by releasing neuromodulators during development and  
232 growth<sup>10,68,69,70</sup>.

233 We identified three distinct populations that expressed neural-associated genes (Figure 6A).  
234 One population was characterised by the expression of genes encoding neuroendocrine protein  
235 7B2 (*7b2*, Smp\_073270) and neuroendocrine convertase 2 (*pc2*, Smp\_077980) and lack of *gnai*  
236 (Smp\_246100) expression (Figure 6A). The *in situ* hybridisation of *7b2* (Smp\_073270) showed  
237 expression in cells of the cephalic ganglia in schistosomula (Figure 6B-C). The cephalic  
238 ganglia region was identified using lectin succinylated Wheat Germ Agglutinin (sWGA)<sup>11</sup>  
239 staining. In adult worms, *7b2* was expressed in the cephalic ganglia as well as in the main and  
240 minor nerve cords (Figure 6C). We refer to this cluster as ‘*7b2/pc2+* nerve’ cells.

241 A second population expressed the uncharacterised gene Smp\_203580 (Figure 6D). Co-  
242 localisation experiments with *7b2* confirmed that this population was distinct from the central  
243 ganglia population (Figure 6D). In the larvae, only six cells (two cells in the head and four cells  
244 in the body) expressed the novel marker Smp\_203580 (Figure 6D) but in adults, an expanded  
245 number of cells were found throughout the body of the parasite (Supplementary Figures 6A  
246 and 6C). These cells displayed 2-3 long cellular processes, branching into different directions  
247 (Supplementary Figure 6B). Interestingly, cells in this cluster also expressed the marker gene  
248 encoding KK7 (Smp\_194830), known to be associated with the peripheral nervous system in  
249 *S. mansoni*<sup>55</sup> (Figure 6E, and Supplementary Figures 6A and 6D). Therefore, we refer to this  
250 population as ‘*Sm-kk7+* nerve cells’.

251 Finally, we identified a population of cells that expressed *gnai* (Smp\_246100), a gene encoding  
252 a G-protein G(i) alpha protein. FISH experiments showed expression of this gene in three cells:  
253 one in gland region of the head, one in the neck region, and one in the body region (Figure 6F).  
254 In adults, this gene is expressed around the main and minor nerve cords (Figure 6G and  
255 Supplementary Figure 6E and 6F). Some *gnai+* cells are also *7b2+* (Figure 6G). We designated  
256 this population as ‘*gnai+* neurons’. Overall, neuronal cells are transcriptionally and spatially  
257 heterogeneous (Figure 6H) and thus are expected to be involved in diverse biological processes.

258 **Conserved gene expression patterns in stem cells and neurons between *S. mansoni* and**  
259 ***Schmidtea mediterranea***

260 Given that some of the populations described herein had not been previously characterised, we  
261 asked if we could further annotate our dataset by comparison to previously annotated single-  
262 cell RNAseq data from *Schmidtea mediterranea*, the closest free-living model organism to *S.*  
263 *mansoni*<sup>31</sup>. To compare clusters, we used a random forest (RF) model trained on *S.*  
264 *mediterranea* to map gene expression signatures between both datasets<sup>71</sup>. Using the RF model,  
265 we classified each of the larval *S. mansoni* cells using the adult *Schmidtea* labels. We  
266 discovered that the stem cell population in our dataset mapped to *Schmidtea* stem cells (Figure  
267 7). This is consistent with previous work that showed similarities between *Schmidtea* and *S.*  
268 *mansoni* stem cells<sup>5,14,15,49,67,72</sup>. We found that *Sm-kk7*+ cells in schistosomula mapped to the  
269 neuronal population annotated as *otoferlin 1 (otf1)*+ cells described by Plass *et. al*<sup>31</sup>. In  
270 addition, *7b2/pc2*+ cells in *S. mansoni* mapped to *spp11*+ and Chat neurons as well as neural  
271 progenitors in *Schmidtea* (Figure 7). In addition, tegument clusters in *S. mansoni* mapped to  
272 early and late epidermal progenitors in *Schmidtea*. The rest of the clusters in *S. mansoni* were  
273 labelled as *psd*+ cells (of unknown function in *S. mediterranea*) and neoblasts. Taken together,  
274 these results suggest that despite great differences in developmental stages between larval  
275 schistosomula and the asexual adult *Schmidtea mediterranea* used for this comparison, marker  
276 genes for stem cells and neuronal populations have been conserved (Table S8-S10).

## 277 Discussion

278 In this study, we have generated a cell atlas of the schistosomulum, the first intra-mammalian  
279 developmental stage of *S. mansoni* and a key target for drug and vaccine development<sup>73,74</sup>. Our  
280 transcriptome analysis enabled the characterisation of 11 distinct clusters, with sufficient  
281 sensitivity to detect as few as three cells per parasite, as demonstrated by the ISH experiments  
282 (Figure 6F). Importantly, the latter allowed us to validate key marker genes for each of the cell  
283 clusters, spatially mapping the cell populations in both schistosomula and adult worms and  
284 linking transcriptomic profiles to anatomical features of the organism.

285 By determining the transcriptome of individual cells from schistosomula, we uncovered marker  
286 genes not only for known populations, such as stem and tegument cells, but also for previously  
287 undescribed cell clusters, such as parenchymal cells. We found that marker genes of the  
288 parenchymal tissue are also expressed in the primordial gut. However, the relationship between  
289 the parenchyma and gut primordial cells is yet to be determined. In planarians, the orthologous  
290 *cathepsin* gene (dd\_Smed\_v6\_81\_0\_1) is a marker for cathepsin+ cells that include cells in the  
291 parenchyma<sup>32</sup>. This planarian *cathepsin* (dd\_Smed\_v6\_81\_0\_1) is also expressed in the  
292 intestine<sup>32</sup> and gut phagocytes<sup>31</sup>. Similarly, planarian *aminopeptidase* (dd\_Smed\_v6\_181\_0\_1)  
293 is expressed in *cathepsin*+ cells, epithelia and intestine<sup>31,32</sup>. Thus, further work is required to  
294 characterise schistosome parenchymal cells and their signaling mechanisms with the  
295 surrounding gut cells<sup>75</sup>.

296 Until now, *S. mansoni* cell types have been revealed primarily through a combination of  
297 morphological and ISH studies of specific tissues, with stem and tegument cell populations  
298 being among the best characterised<sup>5,6,14,15,49</sup>. In the present study, we identified and validated a  
299 novel stem cell marker *calmodulin* (Smp\_032950) that, to our knowledge, has not previously  
300 been associated with stem cells. Calmodulins are Ca<sup>2+</sup> transporters required for the miracidium-  
301 to-sporocyst transition, sporocyst growth<sup>76</sup> and egg hatching<sup>77</sup>. In addition, we found this gene  
302 to be expressed in the reproductive organs of adult males and females.

303 Coordinated neuromuscular activity is essential for schistosomes to migrate through host  
304 tissue<sup>78</sup>. Although circular and longitudinal muscle layers have been described in  
305 *S. mansoni*<sup>9,11,78</sup>, we found no evidence that the three muscle clusters correspond to different  
306 anatomical fiber arrangements. In the free-living planarian *S. mediterranea*, a population of  
307 muscle cells also shows no specific muscle layer localisation, but instead forms a cluster based

308 on enriched expression of position-control genes (PCGs)<sup>32,79</sup>. We therefore reasoned that this  
309 may be the case for at least some of the muscle cells in our dataset.

310 Knowledge of planarian stem cells has previously informed the study of stem cells in  
311 *S. mansoni*<sup>67</sup>. Our comparison between schistosomula and *S. mediterranea* clusters uncovered  
312 conserved features for stem cells and neurons and served to support cell type assignment in  
313 schistosomula. Given that nerve cell populations have remained poorly characterised at the  
314 transcriptome level in schistosomes, planarians may serve as a model to understand the nervous  
315 system biology in schistosomula. A particularly attractive feature of the planaria biology is the  
316 remarkable regenerative properties of these worms. An individual worm comprises all cell  
317 types at intermediate stages of development and regeneration<sup>31,32,80</sup>. This has enabled recent  
318 single-cell sequencing studies in planarians to characterise developmental trajectories from  
319 within the soma of adult worms<sup>31</sup>. However, schistosomes do not share this regenerative  
320 property with their distant free-living relatives, instead intermediate stages of schistosome  
321 development necessarily need to be captured. The data from the present study represent the  
322 first logical step in that characterisation.

323 Despite having successfully characterised several previously unknown marker genes and  
324 populations, we faced challenges throughout the course of this study. Some cells were not  
325 detected, possibly because they are difficult to isolate or relatively rare. One notable example  
326 was the absence of eight known protonephridia cells in the parasite at this developmental  
327 stage<sup>11,81</sup>. Previous single-cell studies in *S. mediterranea* have found that relatively rare cell  
328 types are sometimes embedded in larger neuronal clusters<sup>31,32</sup>, and therefore, it is possible that  
329 this is also the case for this cell group. In addition, schistosomula obtained for this study were  
330 a mixture of males and females. While the male and female schistosomula are morphologically  
331 identical, they may bear transcriptomic differences that are important for early stages of  
332 reproductive development<sup>82</sup>. Future scRNA-Seq studies obtained separately from male and  
333 female schistosomula will be needed to resolve this question.

334 Our study demonstrates the power of single-cell sequencing, coupled with ISH validation, to  
335 transcriptionally and spatially characterise cell types of an entire metazoan parasite for the first  
336 time. This approach is essential for unravelling the developmental biology of this important  
337 parasite.

## 338 **Materials and methods**

### 339 **Ethics statement**

340 The complete life cycle of *Schistosoma mansoni* (NMRI strain) is maintained at the Wellcome  
341 Sanger Institute (WSI). The mouse infections at WSI were conducted under Home Office  
342 Project Licence No. P77E8A062 held by GR, and all protocols were presented and approved  
343 by the Animal Welfare and Ethical Review Body (AWERB) of the WSI, and Institutional  
344 Animal Care and Use Committees (IACUC) at the University of Wisconsin-Madison (protocol  
345 M005569). The AWERB is constituted as required by the UK Animals (Scientific Procedures)  
346 Act 1986 Amendment Regulations 2012.

### 347 **Preparation of parasites**

348 *S. mansoni* schistosomula were obtained by mechanical transformation of cercariae and  
349 cultured as described previously<sup>83</sup>. In brief, snails were washed, transferred to a beaker with  
350 water (~50-100 ml) and exposed under light to induce cercarial shedding for two hours,  
351 replacing the water and collecting cercariae every 30 min. Cercarial water collected from the  
352 beaker was filtered through a 47µm stainless steel Millipore screen apparatus into sterile 50  
353 ml-Falcon tubes to remove any debris and snail faeces. The cercariae were concentrated by  
354 centrifugation (800 g for 15 min), washed three times in 1X PBS supplemented with 2% PSF  
355 (200 U/ml penicillin, 200 µg/ml streptomycin, 500 ng/ml amphotericin B), and three times in  
356 'schistosomula wash medium' (DMEM supplemented with 2% PSF and 10 mM HEPES (4-(2-  
357 hydroxyethyl)-1-piperazineethanesulfonic acid)). The cercarial tails were sheared off by ~20  
358 passes back and forth through a 22-G emulsifying needle, schistosomula bodies were separated  
359 from the sheared tails by Percoll gradient centrifugation, washed three times in schistosomula  
360 wash medium and cultured at 37°C in modified Basch's medium under 5% CO<sub>2</sub> in air<sup>83</sup>.

### 361 **Single-cell tissue dissociation**

362 Two days after transformation the schistosomula cultured in modified Basch's media at 37°C  
363 and 5% CO<sub>2</sub> were collected and processed in two separate batches (batch1 and batch2).  
364 Schistosomula collected from two different snail batches were considered biological replicates.  
365 Data collected as batch3 are 'technical' replicates of batch2 given they were collected on the  
366 same day and from the same pool of parasites. In each experiment, approximately 5,000 larvae  
367 were pooled in 15ml tubes and digested for 30 min in an Innova 4,430 incubator with agitation

368 at 300 rpm at 37°C, using a digestion solution of 750µg/ml Liberase DL (Roche 05466202001).  
369 The resulting suspension was passed through 70µm and 40µm cells strainers (Falcon) .  
370 Dissociated cells were spun at 300 rpm for 5 mins and resuspended in 1X cold PBS  
371 supplemented with 20% heat inactivated fetal bovine serum (twice). The resulting cell  
372 suspension was co-stained with 0.5µg/ml of Fluorescein Diacetate (FDA; Sigma F7378) to  
373 label live cells, and 1µg/ml of Propidium Iodide (PI; Sigma P4864) to label dead/dying cells,  
374 and sorted into eppendorf tubes using the BD *Influx*<sup>TM</sup> cell sorter by enriching for FDA+/ PI-  
375 cells<sup>84</sup>. It took 2-3 hours from the enzymatic digestion to generating single-cell suspensions  
376 ready for library preparation on the 10X Genomics Chromium platform.

### 377 **10X Genomics library preparation and sequencing**

378 The concentration of single cell suspensions was approximately 500 cells/µl as estimated by  
379 flow cytometry-based counting. Cells were loaded according to standard protocol of the  
380 Chromium single-cell 3' kit in order to capture approximately 7,000 cells per reaction (V2  
381 chemistry). However, after sequencing and preliminary analysis, we found the actual number  
382 of captured cells was closer to ~1200 cells per experiment. Single-cell libraries were sequenced  
383 on an Illumina HiSeq4000 (paired-end reads 75bp), using one sequencing lane per sample. All  
384 raw sequence data is deposited in the ENA under the project accession ERP116919.

### 385 **Protein-coding genes**

386 *S. mansoni* gene annotation is based on the latest genome assembly (v7, unpublished). The  
387 identifier for all genes contains the Smp\_ prefix followed by a unique 6-digit number; entirely  
388 new gene models have the first digit '3', eg. Smp\_3xxxxx. To assign a gene name and  
389 functional annotation (used in Tables S4-S6) to 'Smp\_' identifiers, protein-coding transcript  
390 sequences were blasted against SwissProt3 to predict product information (blastp v2.7.0).  
391 Some genes also maintained previous functional annotation from GeneDB. Genes lacking  
392 predicted product information were named hypothetical genes.

### 393 **Mapping and quantification of single-cell RNA-seq**

394 Single-cell RNA-seq data were mapped to the *S. mansoni* reference genome version 7  
395 ([https://parasite.wormbase.org/Schistosoma\\_mansoni\\_prjea36577](https://parasite.wormbase.org/Schistosoma_mansoni_prjea36577)) using the 10X Genomics  
396 analysis pipeline Cell Ranger (v 2.1.0). The default cut-off provided by Cell ranger was used  
397 to detect empty droplets. Approximately 55% of sequenced reads mapped confidently to the

398 transcriptome with an average 297,403 reads per cell. In total 3,513 cells were sequenced, with  
399 a median 918 genes expressed per cell.

#### 400 **Quality control of single-cell data**

401 To filter lower quality cells, the best practices for pre-processing and quality control from the  
402 Scater package (version 1.8.4)<sup>85</sup> were followed. We first created a single cell experiment using  
403 *SingleCellExperiment: S4 Classes for Single Cell Data* R package version 1.5.0<sup>86</sup>. Cells that  
404 had greater than 30,000 Unique Molecular Identifiers (UMIs) were removed. Although tools  
405 are not currently available to determine biological doublets, at the concentrations of cells used  
406 in these experiments, the doublet rate is expected to be very low (~1%). In addition, cells with  
407 mitochondrial gene expression greater than 3% or cells that expressed fewer than 600 genes  
408 per cell were excluded.

409 We further filtered the data by generating a consensus matrix with the SC3 package (version  
410 1.8.0)<sup>41</sup> and excluded any clusters with a cluster stability index of less than 0.10. This was done  
411 on the basis that cells with low stability index included cells that could not be assigned  
412 confidently to a specific cell population. We also excluded clusters containing less than 3 cells  
413 due to the limitations of SC3 to capture rare cell types<sup>41</sup>. In total 2,144 cells out of 3,513 cells  
414 passed QC. Further exclusion of one ambiguous cluster resulted in a total of 1,918 cells.

#### 415 **Data normalisation**

416 Data was first clustered with the quickCluster function from scran (version 1.8.4)<sup>87</sup>. The  
417 quickCluster function groups cells according to their expression profiles. Cell biases were  
418 normalised using the computeSumFactors function. The computeSumFactors function works  
419 on the assumption that most genes are not differentially expressed between cells. As such, any  
420 differences in expression across the majority of the genes are the result of technical biases in  
421 the single-cell dataset and need to be removed<sup>87</sup>. Finally, the normalised expression values  
422 were calculated using the normalise function from the scater package (version 1.8.4)<sup>85</sup>.

#### 423 **Clustering and QC using SC3**

424 The SC3 package (version 1.8.0) was used to cluster and exclude low quality cells from the  
425 dataset<sup>41</sup>. For the consensus clustering, SC3 uses the consensus-based similarity partitioning  
426 algorithm (CSPA). SC3 constructs a binary similarity matrix using cell labels. When two cells

427 belong to the same cluster, the assigned value is 1; otherwise the value is 0. A consensus matrix  
428 is the result of the averaging of all similarity matrices of individual clustering. Based on the  
429 consensus matrix, the cells were then clustered using hierarchical clustering using  $k$  levels of  
430 hierarchy where  $k$  was specified. In the first instance we used a range of values close to the  $k$   
431 value estimated using the `sc3_estimate_k` function ( $k=26$ ) from the SC3 package. The stability  
432 and quality of the clusters was assessed by visually inspecting the data obtained for the  
433 specified  $k$  value ranges. Clusters with stability index less than 0.10 and/ or less than 3 cells  
434 were excluded from further analysis. We continued to re-cluster cells until all clusters had  
435 stability values greater than 0.6 and contained more than 5 cells. We also sub-clustered  
436 populations of cells that were contained within the same  $k$  level of hierarchy but appeared to  
437 be distinct subpopulations of cells.

#### 438 **Clustering using Seurat after QC steps**

439 The Seurat package (version 2.3.4) (<https://satijalab.org/seurat/>) was used to analyse the raw  
440 values of QC matrix<sup>42</sup>. First, we normalised using the `NormalizeData` function from Seurat  
441 (<http://satijalab.org/seurat/>). Following normalisation, we identified highly variable genes  
442 using the `Seurat FindVariableGenes` function using the cut-offs stated in the website:  $z=0.5$  and  
443 mean expression in the range 0.0125 to 3. We identified 12 clusters (including the ambiguous  
444 cluster) using the `FindClusters` function from Seurat with a resolution of 0.6.

#### 445 **Identifying marker genes and cluster annotation**

446 To annotate each cluster, we manually inspected the top markers for each of the populations  
447 and compared to the top markers curated from the literature (Table S6). We used the top  
448 markers identified by SC3 and Seurat packages. SC3 identifies marker genes for each cluster  
449 by constructing a binary classifier based on the mean expression values for each gene. The area  
450 under the operating characteristic (ROC) curve is used to quantify the confidence for that  
451 specific marker. A Wilcoxon signed-rank test is used to assign a P-value to each gene. We  
452 relied on high quality marker genes with area under the curve (AUROC)  $> 0.8$ ,  $P < 10^{-5}$  and  
453 spatial information of those genes to determine the identity of a specific population. We also  
454 used the Seurat package to identify marker genes for each population using the function  
455 `FindAllMarkers`, using the likelihood ratio as specified in the Seurat best practices  
456 (<https://satijalab.org/seurat/>).



## 457 **Gene Ontology (GO) analysis**

458 The Gene Ontology (GO) annotation for *S. mansoni* was obtained using InterProScan v5.25-  
459 64.0 (<https://www.ebi.ac.uk/interpro/>). GO term enrichment was performed using the weight01  
460 method provided in topGO<sup>88</sup> v2.34.0 (available at  
461 <http://bioconductor.org/packages/release/bioc/html/topGO.html>) for all three categories (BP,  
462 MF, and CC). For each category, the analysis was restricted to terms with a node size of  $\geq 5$ .  
463 Fisher's exact test was applied to assess the significance of overrepresented terms compared  
464 with all expressed genes. The threshold was set as  $FDR < 0.01$ .

## 465 **STRINGdb Analysis**

466 We used STRINGdb<sup>89</sup> to identify possible gene interactions that would enable us to  
467 differentiate between tegumental clusters. Briefly, the *S. mansoni* V7 gene identifiers for the  
468 tegument 2 cluster with AUROC  $\geq 0.7$  in Seurat were converted to *S. mansoni* V5 gene  
469 identifiers. The V5 gene identifiers were analysed in STRINGdb v11.0<sup>89</sup>. Human,  
470 *Caenorhabditis elegans* and *Drosophila melanogaster* orthologs of these genes were identified  
471 from WormBase ParaSite<sup>90</sup>.

## 472 **Random Forest (RF)**

473 A single-cell dataset published for *Schmidtea mediterranea* comprising 21,610 cells generated  
474 using a droplet-based platform<sup>31</sup> was employed for this analysis. The relevant files were  
475 downloaded from <https://shiny.mdc-berlin.de/psca/> including the *Schmidtea mediterranea*  
476 single-cell data comprising 21,610 cells. The Seurat package (version 2.3.4) was used for all  
477 analysis of the *Schmidtea* dataset (<https://satijalab.org/seurat/>). We only kept cells that  
478 expressed at least 200 genes, in a minimum of 3 cells. After QC, 21,612 cells and 28,030  
479 transcripts remained. We normalised using NormalizeData function from the Seurat  
480 (<http://satijalab.org/seurat/>). Following normalisation, we identified highly variable genes  
481 using the Seurat FindVariableGenes function using the cut-offs stated in the website:  $z=0.5$  and  
482 mean expression in the range 0.0125 to 3.

483 We identified 22 clusters using the FindClusters function from Seurat with a resolution of 0.6.  
484 We chose this resolution to capture most of the clusters with biological variability whilst  
485 avoiding overclustering. To annotate each cluster, we used the annotation provided by Plass *et*  
486 *al*, 2018<sup>31</sup>.

## 487 **Evaluating the Random Forest on the *Schmidtea mediterranea* dataset**

488 We accessed the transcriptome reference (version 6) for the asexual strain of *Schmidtea*  
489 *mediterranea* from planmine<sup>91</sup>. This version is a Trinity *de novo* transcript assembly<sup>92</sup>. We  
490 used orthoMCL<sup>93</sup> to find 1:1 ortholog genes between *S. mediterranea* and *S. mansoni* by: (i)  
491 collapsing Smp and dd\_Smed genes to their root names and choosing clusters with a single  
492 *Schmidtea* and *Schistosoma* gene; and (ii) removing haplotype Smp genes where doing so  
493 would reduce a multiple Smp set to a single Smp; (iii) If a single Smp (after all the above  
494 checks) contained multiple *Schmidtea* genes, we randomly selected one of the *Schmidtea* genes  
495 only if it did not map to more than one orthologue cluster. This gave us a set of *Schmidtea*-  
496 *Schistosoma* orthologous gene-pairs. All *Schistosoma* genes were then replaced in the  
497 *Schistosoma* single-cell matrix with their *S. mediterranea* orthologs.

498 We first evaluated the RF classifier on the *Schmidtea* dataset. We used R package  
499 randomForest (version 4.6-14) to train the training set using 500 trees. The RF is a supervised  
500 learning method that builds decision trees, trained with a defined set of features (genes). The  
501 training set was built using cells from the 22 clusters in the *Schmidtea* dataset with a maximum  
502 of 70% of cells per cluster. As a first RF test, the training set (70% of cells per cluster) was  
503 used to assign a cluster label for the test set (remaining 30%) of the same dataset. We assigned  
504 a class to each cell when a minimum of 16% of trees in the forest converged onto a decision.

505 To then use the RF classifier on the *Schistosoma* data set, a training set was built using cells  
506 from the 22 clusters in the *Schmidtea* dataset with a maximum of 70% of cells per cluster. This  
507 training set was used to assign labels to the *Schistosoma mansoni* cells using the RF package<sup>94</sup>.  
508 The RF decision trees were trained with a defined set of common 692 orthologous genes  
509 between *S. mansoni* and *S. mediterranea*.

## 510 **Conserved Schmidtea-Schistosoma orthologous markers**

511 To identify conserved *Schmidtea-Schistosoma* one-to-one orthologs, we first identified a high  
512 confidence set of one-to-one orthologs. For each *S. mansoni* predicted protein, we identified  
513 the *S. mediterranea* BLASTP<sup>95</sup> hits, and similarly identified the *S. mansoni* BLASTP hits for  
514 each *S. mediterranea* protein. If a *S. mansoni* gene had haplotypic copies in the *S. mansoni* V7  
515 assembly, we only considered the *S. mansoni* copy on an assembled chromosome, and  
516 discarded the allelic copies of the gene from haplotypic contigs. We considered *S. mansoni* and  
517 *S. mediterranea* genes to be one-to-one orthologs if they were each other's top BLASTP hits,

518 with BLAST  $E < 0.05$ , and the BLAST E-value of the top BLASTP hit was  $1e+5$  times lower  
519 than the BLAST E-value for the next best hit. This gave us 4764 one-to-one *S. mansoni*-*S.*  
520 *mediterranea* orthologs. These orthologs were used to find conserved orthologous markers.

521 To identify conserved orthologous markers, we filtered the 4764 1:1 orthologues to retain only  
522 those for which both the *Schistosoma* and *Schmidtea* genes were identified as Seurat markers  
523 with Seurat P-value  $\leq 1e-30$ , using the Seurat *Schmidtea* clusters from Plass *et al* 2018<sup>31</sup>. If a  
524 *Schistosoma*/*Schmidtea* gene was in more than one cluster, we only considered the cluster for  
525 which it had the lowest (most significant) Seurat P-value.

### 526 ***In situ* hybridization (ISH)**

527 Fluorescence *in situ* hybridization (FISH) and whole-mount colorimetric *in situ* hybridization  
528 (WISH) were performed following previously established protocols<sup>14,15,49</sup> with modifications  
529 specific to schistosomula. Schistosomula were killed with ice-cold 1% HCl for 30–60 s before  
530 fixation. Schistosomula were fixed for ~0.5-1 hour at room temperature in 4% formaldehyde,  
531 0.2% Triton X-100%, 1% NP-40 in PBS. Adult parasites were fixed for 4 hours in 4%  
532 formaldehyde in PBSTx at room temperature. After fixation, schistosomula and adults were  
533 dehydrated in methanol and kept in  $-20^{\circ}\text{C}$  until usage. Parasites were rehydrated, permeabilised  
534 by 10  $\mu\text{g}/\text{mL}$  proteinase K for 10-20 min for schistosomula or 20  $\mu\text{g}/\text{mL}$  proteinase K for 30  
535 min for adults, and fixed for 10 mins immediately following proteinase K treatment.

536 For hybridization, DIG- riboprobes were used for single FISH and WISH, and FITC-  
537 riboprobes were used for double FISH. Anti-DIG-POD and anti-FITC-POD antibodies were  
538 used for FISH at 1:500-1:1000, and anti-DIG-AP antibody was used for WISH. Anti-DIG-  
539 POD and anti-DIG-AP antibodies were incubated overnight at  $4^{\circ}\text{C}$  and anti-FITC-POD was  
540 incubated for ~4 hours at room temperature before overnight incubation at  $4^{\circ}\text{C}$ . For FISH, 2-3  
541 independent experiments were performed, and ~5-10 worms were analysed for each  
542 experiment. For adult FISH and WISH, two independent experiments were performed, with  
543 each experiment containing ~5 male and ~5 females. Primers used for cloning a fragment of  
544 marker genes and riboprobe generation are listed in Table S7.

### 545 **Immunostaining and labeling**

546 Anti-acetylated  $\alpha$ -tubulin antibody (6-11B-1, Santa Cruz) was incubated at 1:500 in blocking  
547 solution (5% Horse serum, 0.5% Roche Western Blocking Reagent in TNTx). Secondary

548 antibody (anti-mouse Alexa Fluor 633, Invitrogen) was used at 1:250-1:500 and was incubated  
549 overnight at 4°C. For lectin labeling, fluorescein succinylated wheat germ agglutinin (sWGA)  
550 (Vector Labs) was used at 1:500 dilution in a blocking solution overnight at 4°C. Fluorescent  
551 dextran was used to label tegument cells<sup>6</sup>. Briefly, schistosomula were transferred to 20µm  
552 mesh in order to flush out as much media while retaining parasites inside the mesh. 2.5mg/ml  
553 dextran biotin-TAMRA-dextran (ThermoFisher Scientific, D3312) was added to the mesh and  
554 parasites transferred into a 1.7ml tube. Immediately after the transfer, schistosomula were  
555 vortexed for ~2-4 minutes at 70% vortex power, transferred back to 20µm mesh and flushed  
556 with schistosomula fixative (4% formaldehyde, 0.2% Triton X-100%, 1% NP-40 in PBS)  
557 before fixing.

### 558 **Imaging and image processing**

559 Schistosomula FISH images were taken using an Andor Spinning Disk WDb system (Andor  
560 Technology). Adult FISH images were taken using a Zeiss LSM 880 with Airyscan (Carl Zeiss)  
561 confocal microscope. Colorimetric WISH images were taken using AxioZoom.V16 (Carl  
562 Zeiss). Imaris 9.2 (Bitplane) and Photoshop (Adobe Systems) was used to process acquired  
563 images of maximum intensity projections (of z-stacks) and single confocal sections for linear  
564 adjustment of brightness and contrast.

### 565 **Calculating cell numbers in schistosomula**

566 Cercariae and parasites at 0, 24 and 48 hr post-transformation were fixed in 5% (v/v)  
567 formaldehyde 4% (w/v) sucrose in PBS for 15 min (throughout staining worms were in 1.5 ml  
568 microfuge tubes and spun down 2 min 500G when exchanging solutions). The parasites were  
569 then permeabilised in 10% (w/v) sucrose, 0.5 % Triton-X 100 (v/v) for 10 min. Parasites were  
570 either stored at 4°C in 2% formaldehyde in PBS, or stained immediately. Staining was in low  
571 light level conditions to minimise photobleaching. 1 µg/ml DAPI in PBS was added for 10 min,  
572 then parasites were post-fixed in 10% formaldehyde in PBS for 2 min, washed in 1X PBS, then  
573 resuspended in 0.4X PBS in ddH<sub>2</sub>O (to discourage salt crystals). 10 µl parasites were pipetted  
574 onto a glass slide and excess liquid drawn away with whatman filter paper. 10 µl ProLong Gold  
575 antifade mountant was added to the sample and a glass coverslip dropped over gently. Slides  
576 were left at room temperature overnight to set before imaging. A Zeiss LSM 510 Meta confocal  
577 microscope was used in conjunction with the Zen software to take a series of Z stacks, imaging  
578 3 individual worms from each timepoint.

579 Z stack images were imported into ImageJ software (Import>image sequence) then converted  
580 to RGB and split by color (Color>split channels) and the blue channel used for further  
581 processing. Using the metadata associated with the file the scale properties were adjusted. The  
582 image was cropped if necessary to show only one parasite. The threshold was set to remove  
583 any background. The signal above threshold was measured for the whole image stack (image  
584 can be inverted and converted to 8 bit for this purpose). The ROI manager was used to measure  
585 individual cell nuclei throughout the Z stack by drawing around the cell on each image of the  
586 stack where present. This was imported to the threshold filtered stack and the area measured.  
587 10 nuclei that were clearly defined and of diverse location and size were measured for each  
588 worm to obtain an average nuclei size and signal. In all cases, Z was used as well as X and Y  
589 to account for the full volume of the nuclei. The total volume for above threshold signal in the  
590 worm was divided by the average nuclei size to obtain an estimate for cell number.

591

592

## 593 **Acknowledgements**

594 The work at WSI was supported by Wellcome (award numbers 206194 and 107475/Z/15/Z).  
595 PAN is an investigator of the Howard Hughes Medical Institute. *B. glabrata* snails used in the  
596 United States were provided by the NIAID Schistosomiasis Resource Center of the Biomedical  
597 Research Institute (Rockville, MD) through NIH-NIAID Contract HHSN272201700014I for  
598 distribution through BEI Resources. We thank the Sequencing and Informatics core facilities  
599 at WSI for their contribution. We also thank the following: Gal Horesh for initial technical  
600 assistance optimising the dissociation conditions; Catherine McCarthy and Simon Clare for  
601 technical support with animal infections and maintenance of the *S. mansoni* life cycle; David  
602 Goulding and Claire Cormie at the Electron and Advanced Light Microscopy facility; Jennie  
603 Graham and Sam Thompson at the Cytometry Core Facility; Nancy Holroyd, Mandy Sanders,  
604 Elizabeth Cook and Nathalie Smerdon for facilitating the submission of 10X samples; and  
605 Matthew Jones for 10X training and library preparations. The authors thank Dr. Shristi Pandey  
606 for sharing the random forest code used in this work and Dr. Mireya Plass for sharing the  
607 planaria dataset.

608

## 609 **Competing financial interests**

610 H.M. Bennett is currently employed at Berkeley Lights Inc. which makes commercially  
611 available single-cell technology

612

613

614

## 615 **References**

- 616 1 Hoffmann, K. F., Brindley, P. J. & Berriman, M. Halting harmful helminths.  
617 doi:10.1126/science.1261139 (2014).
- 618 2 Dorsey, C. H., Cousin, C. E., Lewis, F. A. & Stirewalt, M. A. Ultrastructure of the  
619 *Schistosoma mansoni* cercaria. *Micron* **33**, 279-323, doi:Pii S0968-4328(01)00019-1
- 620 3 Cioli, D., Pica-Mattoccia, L., Basso, A. & Guidi, A. Schistosomiasis control:  
621 praziquantel forever? *Molecular and biochemical parasitology* **195**, 23-29,  
622 doi:10.1016/j.molbiopara.2014.06.002 (2014).
- 623 4 Hockley, D. J. & McLaren, D. J. *Schistosoma mansoni*: changes in the outer membrane  
624 of the tegument during development from cercaria to adult worm. *International journal for*  
625 *parasitology* **3**, 13-25 (1973).
- 626 5 Collins, J. J., Wendt, G. R., Iyer, H. & Newmark, P. A. in *eLife* Vol. 5 (2016).
- 627 6 Wendt, G. R. *et al.* Flatworm-specific transcriptional regulators promote the  
628 specification of tegumental progenitors in *Schistosoma mansoni*. *eLife* **7**,  
629 doi:10.7554/eLife.33221 (2018).
- 630 7 Wilson, R. A. The saga of schistosome migration and attrition. *Parasitology* **136**, 1581-  
631 1592, doi:10.1017/s0031182009005708 (2009).
- 632 8 Wilson, R. A. & Barnes, P. E. The tegument of *Schistosoma mansoni*: observations on  
633 the formation, structure and composition of cytoplasmic inclusions in relation to tegument  
634 function. *Parasitology* **68**, 239-258 (1974).
- 635 9 Sulbarán, G. *et al.* An invertebrate smooth muscle with striated muscle myosin  
636 filaments. doi:10.1073/pnas.1513439112 (2015).
- 637 10 Halton, D. W. & Gustafsson, M. K. S. Functional morphology of the platyhelminth  
638 nervous system. *Parasitology* **113**, S47-S72, doi:Doi 10.1017/S0031182000077891 (1996).
- 639 11 Collins, J. J., 3rd, King, R. S., Cogswell, A., Williams, D. L. & Newmark, P. A. An  
640 atlas for *Schistosoma mansoni* organs and life-cycle stages using cell type-specific markers  
641 and confocal microscopy. *PLoS neglected tropical diseases* **5**, e1009,  
642 doi:10.1371/journal.pntd.0001009 (2011).
- 643 12 Lu, Z. *et al.* Schistosome sex matters: a deep view into gonad-specific and pairing-  
644 dependent transcriptomes reveals a complex gender interplay. *Sci Rep* **6**, 31150,  
645 doi:10.1038/srep31150 (2016).
- 646 13 Senft, A. W., Philpott, D. E. & Pelofsky, A. H. Electron microscope observations of  
647 the integument, flame cells, and gut of *Schistosoma mansoni*. *The Journal of parasitology* **47**,  
648 217-229 (1961).
- 649 14 Wang, B., Collins, J. J., 3rd & Newmark, P. A. Functional genomic characterization of  
650 neoblast-like stem cells in larval *Schistosoma mansoni*. *eLife* **2**, e00768,  
651 doi:10.7554/eLife.00768 (2013).

- 652 15 Wang, B. *et al.* Stem cell heterogeneity drives the parasitic life cycle of *Schistosoma*  
653 *mansoni*. *eLife* **7**, doi:10.7554/eLife.35449 (2018).
- 654 16 Hoffmann, K. F., Johnston, D. A. & Dunne, D. W. Identification of *Schistosoma*  
655 *mansoni* gender-associated gene transcripts by cDNA microarray profiling. *Genome Biology* **3**  
656 (2002).
- 657 17 Fitzpatrick, J. M. *et al.* An oligonucleotide microarray for transcriptome analysis of  
658 *Schistosoma mansoni* and its application/use to investigate gender-associated gene expression.  
659 *Molecular and biochemical parasitology* **141**, 1-13, doi:10.1016/j.molbiopara.2005.01.007  
660 (2005).
- 661 18 Chai, M. *et al.* Transcriptome profiling of lung schistosomula, in vitro cultured  
662 schistosomula and adult *Schistosoma japonicum*. *Cellular and molecular life sciences : CMLS*  
663 **63**, 919-929, doi:10.1007/s00018-005-5578-1 (2006).
- 664 19 Dillon, G. P. *et al.* Microarray analysis identifies genes preferentially expressed in the  
665 lung schistosomulum of *Schistosoma mansoni*. *International journal for parasitology* **36**, 1-8,  
666 doi:10.1016/j.ijpara.2005.10.008 (2006).
- 667 20 Gobert, G. N. *et al.* Tissue specific profiling of females of *Schistosoma japonicum* by  
668 integrated laser microdissection microscopy and microarray analysis. *PLoS neglected tropical*  
669 *diseases* **3**, e469, doi:10.1371/journal.pntd.0000469 (2009).
- 670 21 Parker-Manuel, S. J., Ivens, A. C., Dillon, G. P. & Wilson, R. A. Gene expression  
671 patterns in larval *Schistosoma mansoni* associated with infection of the mammalian host. *PLoS*  
672 *neglected tropical diseases* **5**, e1274, doi:10.1371/journal.pntd.0001274 (2011).
- 673 22 Protasio, A. V., Dunne, D. W. & Berriman, M. Comparative study of transcriptome  
674 profiles of mechanical- and skin-transformed *Schistosoma mansoni* schistosomula. *PLoS*  
675 *neglected tropical diseases* **7**, e2091, doi:10.1371/journal.pntd.0002091 (2013).
- 676 23 Anderson, L. *et al.* *Schistosoma mansoni* Egg, Adult Male and Female Comparative  
677 Gene Expression Analysis and Identification of Novel Genes by RNA-Seq. *PLoS neglected*  
678 *tropical diseases* **9**, e0004334, doi:10.1371/journal.pntd.0004334 (2015).
- 679 24 Gobert, G. N., Moertel, L., Brindley, P. J. & McManus, D. P. Developmental gene  
680 expression profiles of the human pathogen *Schistosoma japonicum*. *BMC genomics* **10**,  
681 doi:Artn 128 10.1186/1471-2164-10-128 (2009).
- 682 25 Ramsköld, D. *et al.* Full-Length mRNA-Seq from single cell levels of RNA and  
683 individual circulating tumor cells. *Nat Biotechnol* **30**, 777-782, doi:10.1038/nbt.2282 (2012).
- 684 26 Pollen, A. A. *et al.* Low-coverage single-cell mRNA sequencing reveals cellular  
685 heterogeneity and activated signaling pathways in developing cerebral cortex. *Nature*  
686 *Biotechnology* **32**, 1053, doi:doi:10.1038/nbt.2967 (2014).
- 687 27 Zeisel, A. *et al.* Brain structure. Cell types in the mouse cortex and hippocampus  
688 revealed by single-cell RNA-seq. *Science (New York, N.Y.)* **347**, 1138-1142,  
689 doi:10.1126/science.aaa1934 (2015).



- 690 28 Karaiskos, N. *et al.* The Drosophila embryo at single-cell transcriptome resolution.  
691 *Science (New York, N.Y.)* **358**, 194-199, doi:10.1126/science.aan3235 (2017).
- 692 29 Cao, J. *et al.* Comprehensive single-cell transcriptional profiling of a multicellular  
693 organism. *Science (New York, N.Y.)* **357**, 661-667, doi:10.1126/science.aam8940 (2017).
- 694 30 Zheng, G. X. Y. *et al.* Massively parallel digital transcriptional profiling of single cells.  
695 *Nature Communications* **8**, 14049, doi:doi:10.1038/ncomms14049 (2017).
- 696 31 Plass, M. *et al.* Cell type atlas and lineage tree of a whole complex animal by single-  
697 cell transcriptomics. *Science (New York, N.Y.)* **360**, doi:10.1126/science.aaq1723 (2018).
- 698 32 Fincher, C. T., Wurtzel, O., de Hoog, T., Kravarik, K. M. & Reddien, P. W. Cell type  
699 transcriptome atlas for the planarian *Schmidtea mediterranea*. *Science (New York, N.Y.)* **360**,  
700 doi:10.1126/science.aaq1736 (2018).
- 701 33 Trapnell, C. *et al.* The dynamics and regulators of cell fate decisions are revealed by  
702 pseudotemporal ordering of single cells. *Nat Biotechnol* **32**, 381-386, doi:10.1038/nbt.2859  
703 (2014).
- 704 34 Manno, G. L. *et al.* RNA velocity of single cells. *Nature* **560**, 494,  
705 doi:doi:10.1038/s41586-018-0414-6 (2018).
- 706 35 Reid, A. J. *et al.* Single-cell RNA-seq reveals hidden transcriptional variation in malaria  
707 parasites. doi:doi:10.7554/eLife.33105 (2018).
- 708 36 Wagner, D. E. *et al.* Single-cell mapping of gene expression landscapes and lineage in  
709 the zebrafish embryo. *Science (New York, N.Y.)* **360**, 981-987, doi:10.1126/science.aar4362  
710 (2018).
- 711 37 Farrell, J. A. *et al.* Single-cell reconstruction of developmental trajectories during  
712 zebrafish embryogenesis. *Science (New York, N.Y.)* **360**, doi:10.1126/science.aar3131 (2018).
- 713 38 Briggs, J. A. *et al.* The dynamics of gene expression in vertebrate embryogenesis at  
714 single-cell resolution. *Science (New York, N.Y.)* **360**, doi:10.1126/science.aar5780 (2018).
- 715 39 Zeng, A. *et al.* Prospectively Isolated Tetraspanin(+) Neoblasts Are Adult Pluripotent  
716 Stem Cells Underlying Planaria Regeneration. *Cell* **173**, 1593-1608 e1520,  
717 doi:10.1016/j.cell.2018.05.006 (2018).
- 718 40 Sanchez Alvarado, A. & Newmark, P. A. The use of planarians to dissect the molecular  
719 basis of metazoan regeneration. *Wound Repair Regen* **6**, 413-420 (1998).
- 720 41 Kiselev, V. Y. *et al.* SC3: consensus clustering of single-cell RNA-seq data. *Nature*  
721 *Methods* **14**, 483, doi:doi:10.1038/nmeth.4236 (2017).
- 722 42 Butler, A., Hoffman, P., Smibert, P., Papalexi, E. & Satija, R. Integrating single-cell  
723 transcriptomic data across different conditions, technologies, and species. *Nat Biotechnol* **36**,  
724 411-420, doi:10.1038/nbt.4096 (2018).
- 725 43 Becht, E. *et al.* Dimensionality reduction for visualizing single-cell data using UMAP.  
726 *Nature Biotechnology* **37**, 38-+, doi:10.1038/nbt.4314 (2019).

- 727 44 Francis, P. & Bickle, Q. Cloning of a 21.7-Kda Vaccine-Dominant Antigen Gene of  
728 Schistosoma-Mansoni Reveals an Ef Hand-Like Motif. *Molecular and biochemical*  
729 *parasitology* **50**, 215-224, doi:Doi 10.1016/0166-6851(92)90218-9 (1992).
- 730 45 Tararam, C. A., Farias, L. P., Wilson, R. A. & Leite, L. C. Schistosoma mansoni  
731 Annexin 2: molecular characterization and immunolocalization. *Experimental parasitology*  
732 **126**, 146-155, doi:10.1016/j.exppara.2010.04.008 (2010).
- 733 46 Fitzsimmons, C. M. *et al.* The Schistosoma mansoni tegumental-allergen-like (TAL)  
734 protein family: influence of developmental expression on human IgE responses. *PLoS*  
735 *neglected tropical diseases* **6**, e1593, doi:10.1371/journal.pntd.0001593 (2012).
- 736 47 Chen, J. *et al.* Molecular cloning and expression profiles of Argonaute proteins in  
737 Schistosoma japonicum. *Parasitology research* **107**, 889-899, doi:10.1007/s00436-010-1946-  
738 3 (2010).
- 739 48 Anderson, L., Pierce, R. J. & Verjovski-Almeida, S. Schistosoma mansoni histones:  
740 From transcription to chromatin regulation; an in silico analysis. *Molecular and biochemical*  
741 *parasitology* **183**, 105-114, doi:10.1016/j.molbiopara.2012.03.001 (2012).
- 742 49 Collins, J. J., 3rd *et al.* Adult somatic stem cells in the human parasite Schistosoma  
743 mansoni. *Nature* **494**, 476-479, doi:10.1038/nature11924 (2013).
- 744 50 Olson, E. N. MyoD family: a paradigm for development? *Genes & development* **4**,  
745 1454-1461 (1990).
- 746 51 Arber, S., Halder, G. & Caroni, P. Muscle LIM protein, a novel essential regulator of  
747 myogenesis, promotes myogenic differentiation. *Cell* **79**, 221-231 (1994).
- 748 52 Gomes, A. V., Potter, J. D. & Szczesna-Cordary, D. The role of troponins in muscle  
749 contraction. *IUBMB Life* **54**, 323-333, doi:10.1080/15216540216037 (2002).
- 750 53 Laube, B., Hirai, H., Sturgess, M., Betz, H. & Kuhse, J. Molecular determinants of  
751 agonist discrimination by NMDA receptor subunits: analysis of the glutamate binding site on  
752 the NR2B subunit. *Neuron* **18**, 493-503 (1997).
- 753 54 Mbikay, M., Seidah, N. G. & Chrétien, M. Neuroendocrine secretory protein 7B2:  
754 structure, expression and functions. *The Biochemical journal* **357**, 329-342 (2001).
- 755 55 SJ, M. Patterns of Gene Expression in Schistosoma mansoni larvae associated with  
756 Infection of the Mammalia Host PhD thesis, University of York, (2010).
- 757 56 Lodish, H. *et al.* Myosin: The Actin Motor Protein.  
758 doi:<https://www.ncbi.nlm.nih.gov/books/NBK21724/> (2000).
- 759 57 Inomata, H. Scaling of pattern formations and morphogen gradients. *Dev Growth Differ*  
760 **59**, 41-51, doi:10.1111/dgd.12337 (2017).
- 761 58 Adell, T., Cebria, F. & Salo, E. Gradients in planarian regeneration and homeostasis.  
762 *Cold Spring Harb Perspect Biol* **2**, a000505, doi:10.1101/cshperspect.a000505 (2010).

- 763 59 Braschi, S., Borges, W. C. & Wilson, R. A. Proteomic analysis of the schistosome  
764 tegument and its surface membranes. *Memorias do Instituto Oswaldo Cruz* **101 Suppl 1**, 205-  
765 212, doi:10.1590/s0074-02762006000900032 (2006).
- 766 60 Li, X. H. *et al.* The schistosome oesophageal gland: initiator of blood processing. *PLoS*  
767 *neglected tropical diseases* **7**, e2337, doi:10.1371/journal.pntd.0002337 (2013).
- 768 61 Bogitsh, B. J. & Carter, O. S. Schistosoma mansoni: ultrastructural studies on the  
769 esophageal secretory granules. *The Journal of parasitology* **63**, 681-686 (1977).
- 770 62 Wilson, R. A. *et al.* The Schistosome Esophagus Is a 'Hotspot' for Microexon and  
771 Lysosomal Hydrolase Gene Expression: Implications for Blood Processing. *PLoS neglected*  
772 *tropical diseases* **9**, e0004272, doi:10.1371/journal.pntd.0004272 (2015).
- 773 63 Mousavi, S. A., Malerod, L., Berg, T. & Kjekken, R. Clathrin-dependent endocytosis.  
774 *The Biochemical journal* **377**, 1-16, doi:10.1042/bj20031000 (2004).
- 775 64 Skelly, P. J. & Shoemaker, C. B. The Schistosoma mansoni host-interactive tegument  
776 forms from vesicle eruptions of a cyton network. *Parasitology* **122 Pt 1**, 67-73 (2001).
- 777 65 de la Torre-Escudero, E., Perez-Sanchez, R., Manzano-Roman, R. & Oleaga, A. In vivo  
778 intravascular biotinylation of Schistosoma bovis adult worms and proteomic analysis of  
779 tegumental surface proteins. *Journal of proteomics* **94**, 513-526,  
780 doi:10.1016/j.jprot.2013.09.020 (2013).
- 781 66 McCarthy, E. *et al.* Leucine aminopeptidase of the human blood flukes, Schistosoma  
782 mansoni and Schistosoma japonicum. *International journal for parasitology* **34**, 703-714,  
783 doi:10.1016/j.ijpara.2004.01.008 (2004).
- 784 67 Collins, J. J., 3rd & Newmark, P. A. It's no fluke: the planarian as a model for  
785 understanding schistosomes. *PLoS Pathog* **9**, e1003396, doi:10.1371/journal.ppat.1003396  
786 (2013).
- 787 68 Eriksson, K. S., Maule, A. G., Halton, D. W., Panula, P. A. & Shaw, C. GABA in the  
788 nervous system of parasitic flatworms. *Parasitology* **110 ( Pt 3)**, 339-346 (1995).
- 789 69 Collins, J. J., 3rd *et al.* Genome-wide analyses reveal a role for peptide hormones in  
790 planarian germline development. *PLoS biology* **8**, e1000509,  
791 doi:10.1371/journal.pbio.1000509 (2010).
- 792 70 Miller, C. M. & Newmark, P. A. An insulin-like peptide regulates size and adult stem  
793 cells in planarians. *Int J Dev Biol* **56**, 75-82, doi:10.1387/ijdb.113443cm (2012).
- 794 71 Pandey, S., Shekhar, K., Regev, A. & Schier, A. F. Comprehensive Identification and  
795 Spatial Mapping of Habenular Neuronal Types Using Single-Cell RNA-Seq. *Current biology*  
796 : *CB* **28**, 1052-1065.e1057, doi:10.1016/j.cub.2018.02.040 (2018).
- 797 72 Collins, J. J., 3rd. Platyhelminthes. *Current biology : CB* **27**, R252-R256,  
798 doi:10.1016/j.cub.2017.02.016 (2017).

- 799 73 Wilson, R. A., University of York, Y., UK, Coulson, P. S. & University of York, Y.,  
800 UK. Schistosome vaccines: a critical appraisal. *Mem. Inst. Oswaldo Cruz* **101**, 13-20,  
801 doi:10.1590/S0074-02762006000900004 (2006).
- 802 74 Wilson, R. A., Li, X. H. & Castro-Borges, W. in *Parasites & vectors* Vol. 9 (2016).
- 803 75 Roberts-Galbraith, R. H., Brubacher, J. L. & Newmark, P. A. A functional genomics  
804 screen in planarians reveals regulators of whole-brain regeneration. *eLife* **5**,  
805 doi:10.7554/eLife.17002 (2016).
- 806 76 Taft, A. S. & Yoshino, T. P. Cloning and functional characterization of two calmodulin  
807 genes during larval development in the parasitic flatworm *Schistosoma mansoni*. *The Journal*  
808 *of parasitology* **97**, 72-81, doi:10.1645/GE-2586.1 (2011).
- 809 77 Katsumata, T., Kohno, S., Yamaguchi, K., Hara, K. & Aoki, Y. Hatching of  
810 *Schistosoma mansoni* eggs is a Ca<sup>2+</sup>/calmodulin-dependent process. *Parasitology research*  
811 **76**, 90-91 (1989).
- 812 78 Zhang, S. *et al.* Quantifying the mechanics of locomotion of the schistosome pathogen  
813 with respect to changes in its physical environment. *J R Soc Interface* **16**, 20180675,  
814 doi:10.1098/rsif.2018.0675 (2019).
- 815 79 Witchley, J. N., Mayer, M., Wagner, D. E., Owen, J. H. & Reddien, P. W. Muscle cells  
816 provide instructions for planarian regeneration. *Cell reports* **4**, 633-641,  
817 doi:10.1016/j.celrep.2013.07.022 (2013).
- 818 80 Davies, E. L. *et al.* Embryonic origin of adult stem cells required for tissue homeostasis  
819 and regeneration. *eLife* **6**, doi:10.7554/eLife.21052 (2017).
- 820 81 WILSON, A. PROTONEPHRIDIA. *Biological Reviews - Wiley Online Library*,  
821 doi:10.1111/j.1469-185X.1974.tb01572.x (1974).
- 822 82 Picard, M. A. *et al.* Sex-Biased Transcriptome of *Schistosoma mansoni*: Host-Parasite  
823 Interaction, Genetic Determinants and Epigenetic Regulators Are Associated with Sexual  
824 Differentiation. *PLoS neglected tropical diseases* **10**, e0004930,  
825 doi:10.1371/journal.pntd.0004930 (2016).
- 826 83 Mann, V. H., Morales, M. E., Rinaldi, G. & Brindley, P. J. Culture for genetic  
827 manipulation of developmental stages of *Schistosoma mansoni*. *Parasitology* **137**, 451-462,  
828 doi:10.1017/S0031182009991211 (2010).
- 829 84 Peak, E., Chalmers, I. W. & Hoffmann, K. F. Development and validation of a  
830 quantitative, high-throughput, fluorescent-based bioassay to detect schistosoma viability. *PLoS*  
831 *neglected tropical diseases* **4**, e759, doi:10.1371/journal.pntd.0000759 (2010).
- 832 85 McCarthy, D. J., Campbell, K. R., Lun, A. T. & Wills, Q. F. Scater: pre-processing,  
833 quality control, normalization and visualization of single-cell RNA-seq data in R.  
834 *Bioinformatics (Oxford, England)* **33**, 1179-1186, doi:10.1093/bioinformatics/btw777 (2017).
- 835 86 SingleCellExperiment: S4 Classes for Single Cell Data. R package version 1.5.2.  
836 (Bioconductor, 2019).

837 87 Lun, A. T. L., Bach, K. & Marioni, J. C. Pooling across cells to normalize single-cell  
838 RNA sequencing data with many zero counts. *Genome Biology* **17**, 75,  
839 doi:doi:10.1186/s13059-016-0947-7 (2016).

840 88 Alexa A, R. J. topGO: Enrichment Analysis for Gene Ontology, (2019).

841 89 Szklarczyk, D. *et al.* STRING v11: protein-protein association networks with increased  
842 coverage, supporting functional discovery in genome-wide experimental datasets. *Nucleic  
843 acids research* **47**, D607-D613, doi:10.1093/nar/gky1131 (2019).

844 90 Howe, K. L., Bolt, B. J., Shafie, M., Kersey, P. & Berriman, M. WormBase ParaSite -  
845 a comprehensive resource for helminth genomics. *Molecular and biochemical parasitology*  
846 **215**, 2-10, doi:10.1016/j.molbiopara.2016.11.005 (2017).

847 91 Brandl, H. *et al.* PlanMine – a mineable resource of planarian biology and biodiversity.  
848 *Nucleic acids research* **44**, D764-773, doi:10.1093/nar/gkv1148 (2016).

849 92 Haas, B. J. *et al.* De novo transcript sequence reconstruction from RNA-seq using the  
850 Trinity platform for reference generation and analysis. *Nat Protoc* **8**, 1494-1512,  
851 doi:10.1038/nprot.2013.084 (2013).

852 93 Li, L., Christian J. Stoeckert, J. & Roos, D. S. OrthoMCL: Identification of Ortholog  
853 Groups for Eukaryotic Genomes. doi:10.1101/gr.1224503 (2003).

854 94 Breiman, L. Random Forests. *Machine Learning* **45**, 5-32,  
855 doi:10.1023/A:1010933404324 (2001).

856 95 Altschul, S. F. *et al.* Gapped BLAST and PSI-BLAST: a new generation of protein  
857 database search programs. *Nucleic acids research* **25**, 3389-3402, doi:10.1093/nar/25.17.3389  
858 (1997).

859

860

861

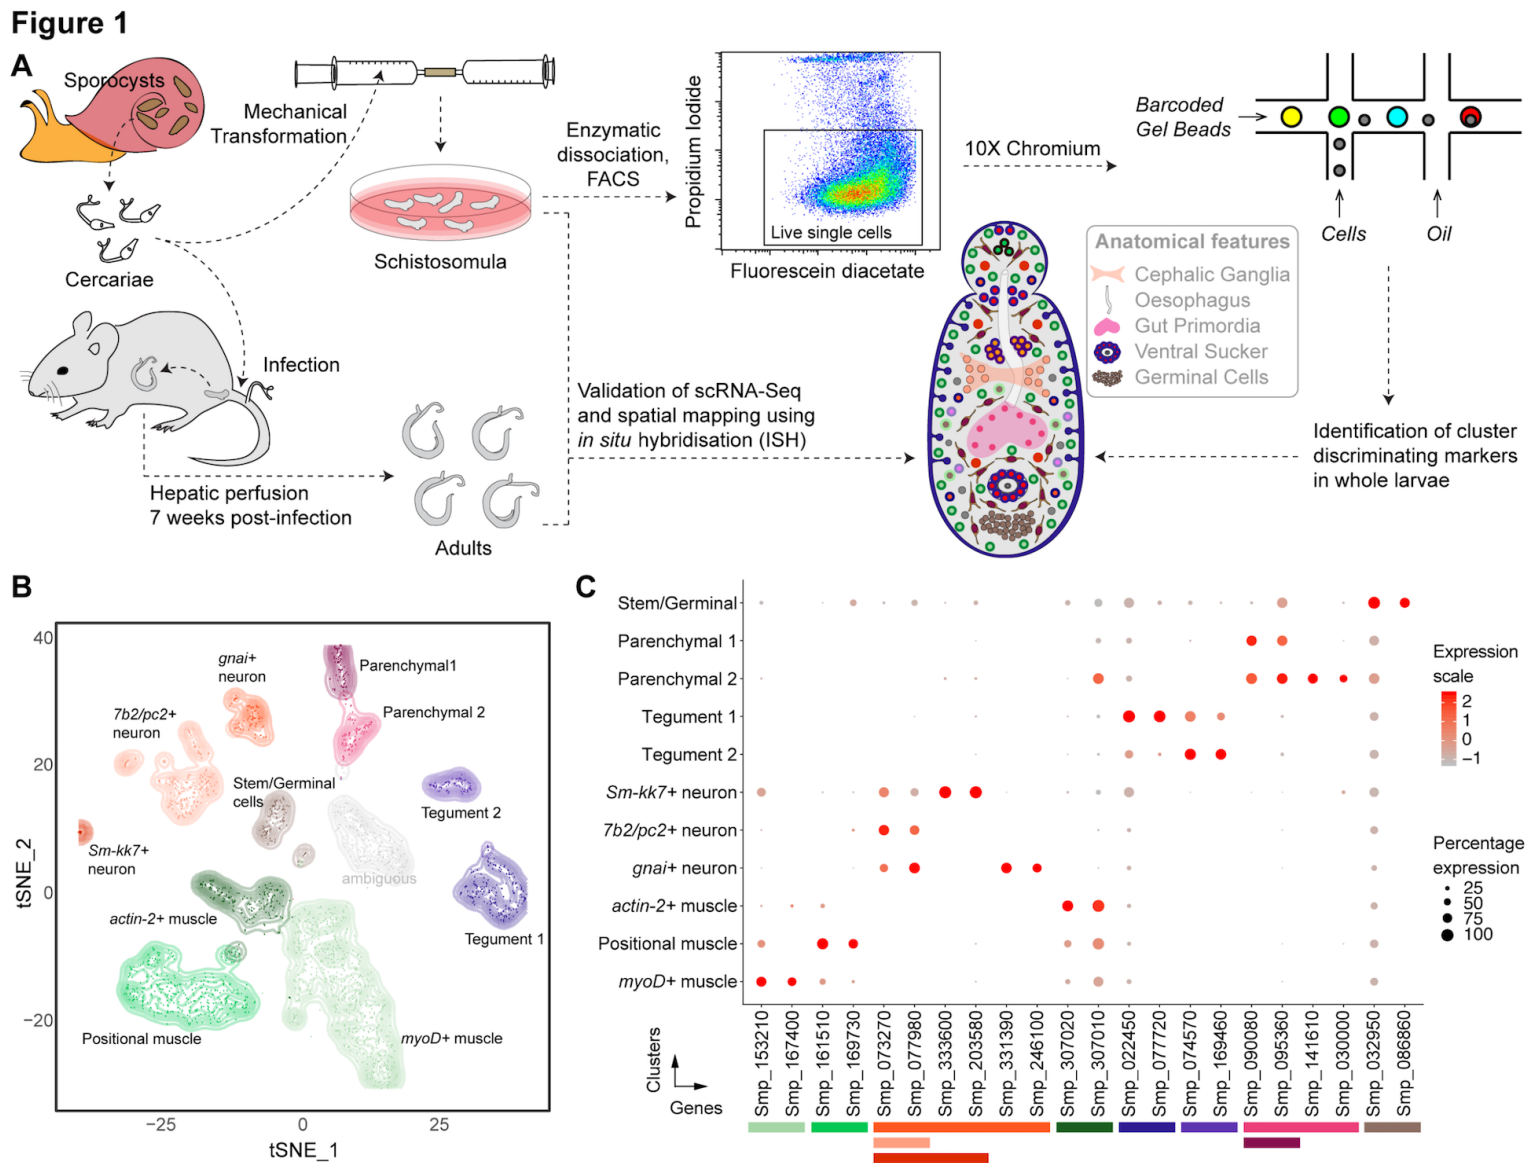

**Figure 1. Identification of 11 transcriptionally distinct cell types in schistosomula.**

(A) Experimental scheme describing the sources of the parasite material, single-cell analysis and validation pipeline. Approximately 5,000 schistosomula per experiment were dissociated, followed by enrichment of fluorescein diacetate (FDA+) live cells using fluorescence-activated cell sorting (FACS). Cells were loaded according to the 10X Chromium single-cell 3' protocol. Clustering was carried out to identify distinct populations and population-specific markers. Validation of population-specific markers was performed by *in situ* hybridisation (ISH). (B) t-distributed stochastic neighbour embedding (t-SNE) representation of 2,144 schistosomulum single cells. Clusters are coloured, distinctively labelled, and emphasised with density contours. One ambiguous cluster is de-emphasised and shown in grey. (C) Gene expression profiles of population markers identified for each of the cell clusters. The colours represent the level of expression from dark red (high expression) to light red (low expression). The sizes of the circles represent the percentages of cells in those clusters that expressed a specific gene. The colour bars under gene IDs represent the clusters in (B).

**Figure 2**

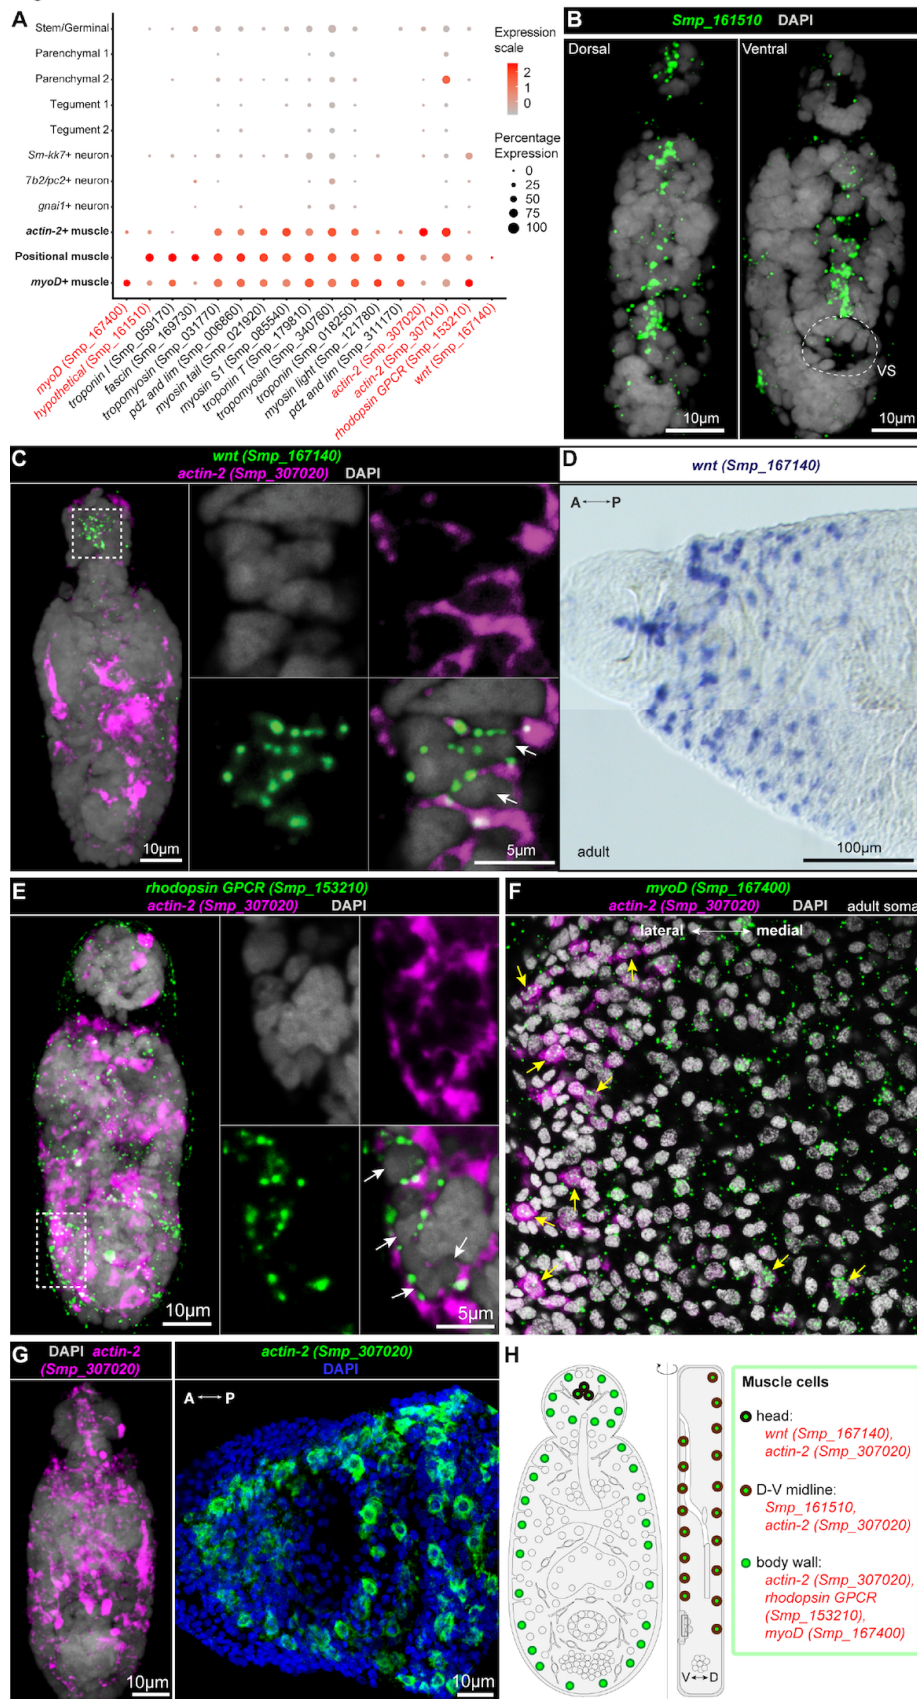

### Figure 3

A

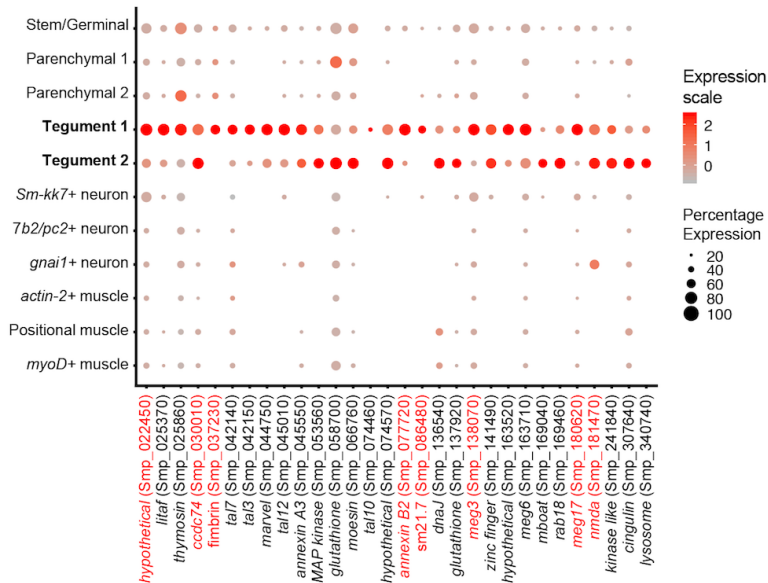

### Figure 3. Two distinct populations of tegumental cells in schistosomula.

(A) Expression profiles of cell marker genes that are specific of or enriched in the tegument clusters. Genes validated by ISH are marked in red. (B) Double FISH of Tegument 1 markers *annexin B2* (Smp\_077720) and Smp\_022450. The majority of the cells show co-localisation (white signal). MIP on the left, and zoomed-in confocal sections on the right. (C) *annexin B2*+ cells have taken up the fluorescent dextran. Yellow arrowheads indicate double positive cells. Single confocal sections are shown. (D) Double FISH of Smp\_022450 and *meg3* (Smp\_138070), both Tegument 1 markers. The majority of the cells show co-localisation (white signal). (E) Double FISH of *meg17* (Smp\_180620) with a known oesophageal gland gene *meg4* (Smp\_163630). *meg17* is expressed in other regions of the body including in the oesophageal gland. (F-G) Double FISH of Tegument 1 marker (Smp\_022450) with (F) *ccdc74* (Smp\_030010) and (G) *nmda* (Smp\_181470). The majority of cells show co-localisation (white signal), while a subset of cells in the anterior portion of the worm show single positive cells for Tegument 2 markers. (H) Schematic that summarises the tegument cell populations in 2-day schistosomula. Marker genes identified in the current study are indicated in red. All previously reported genes are shown in black. VS: ventral sucker; GC: germinal cell cluster.

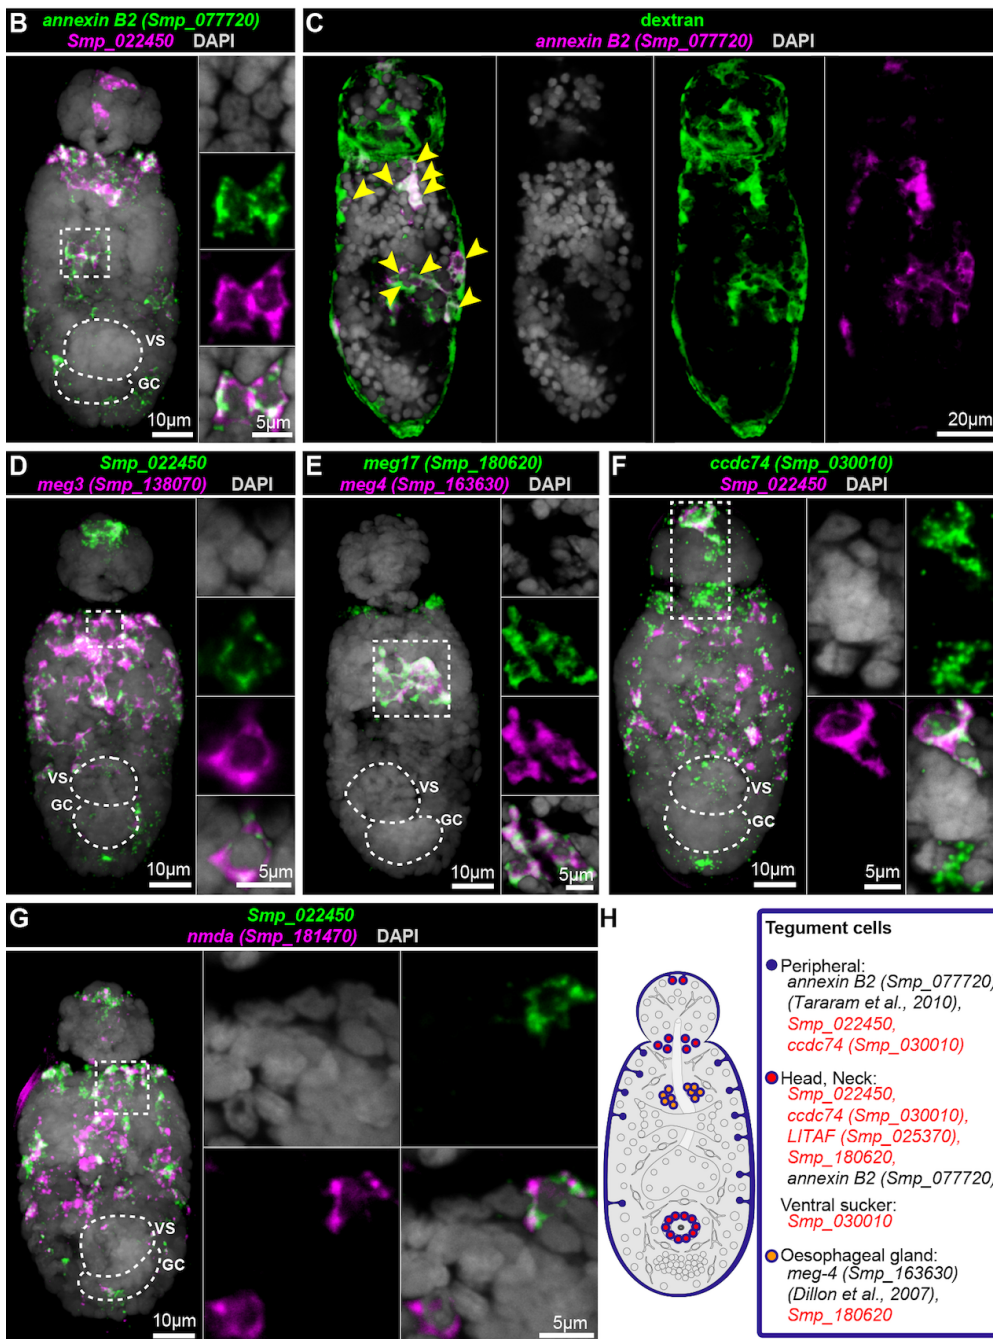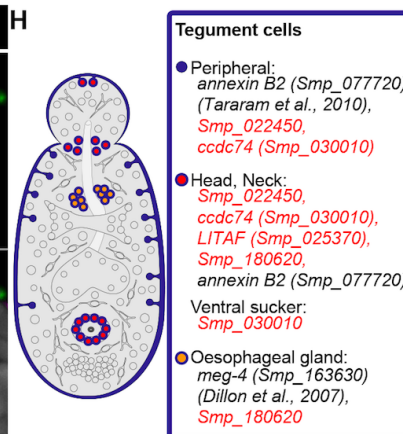



**Figure 4**

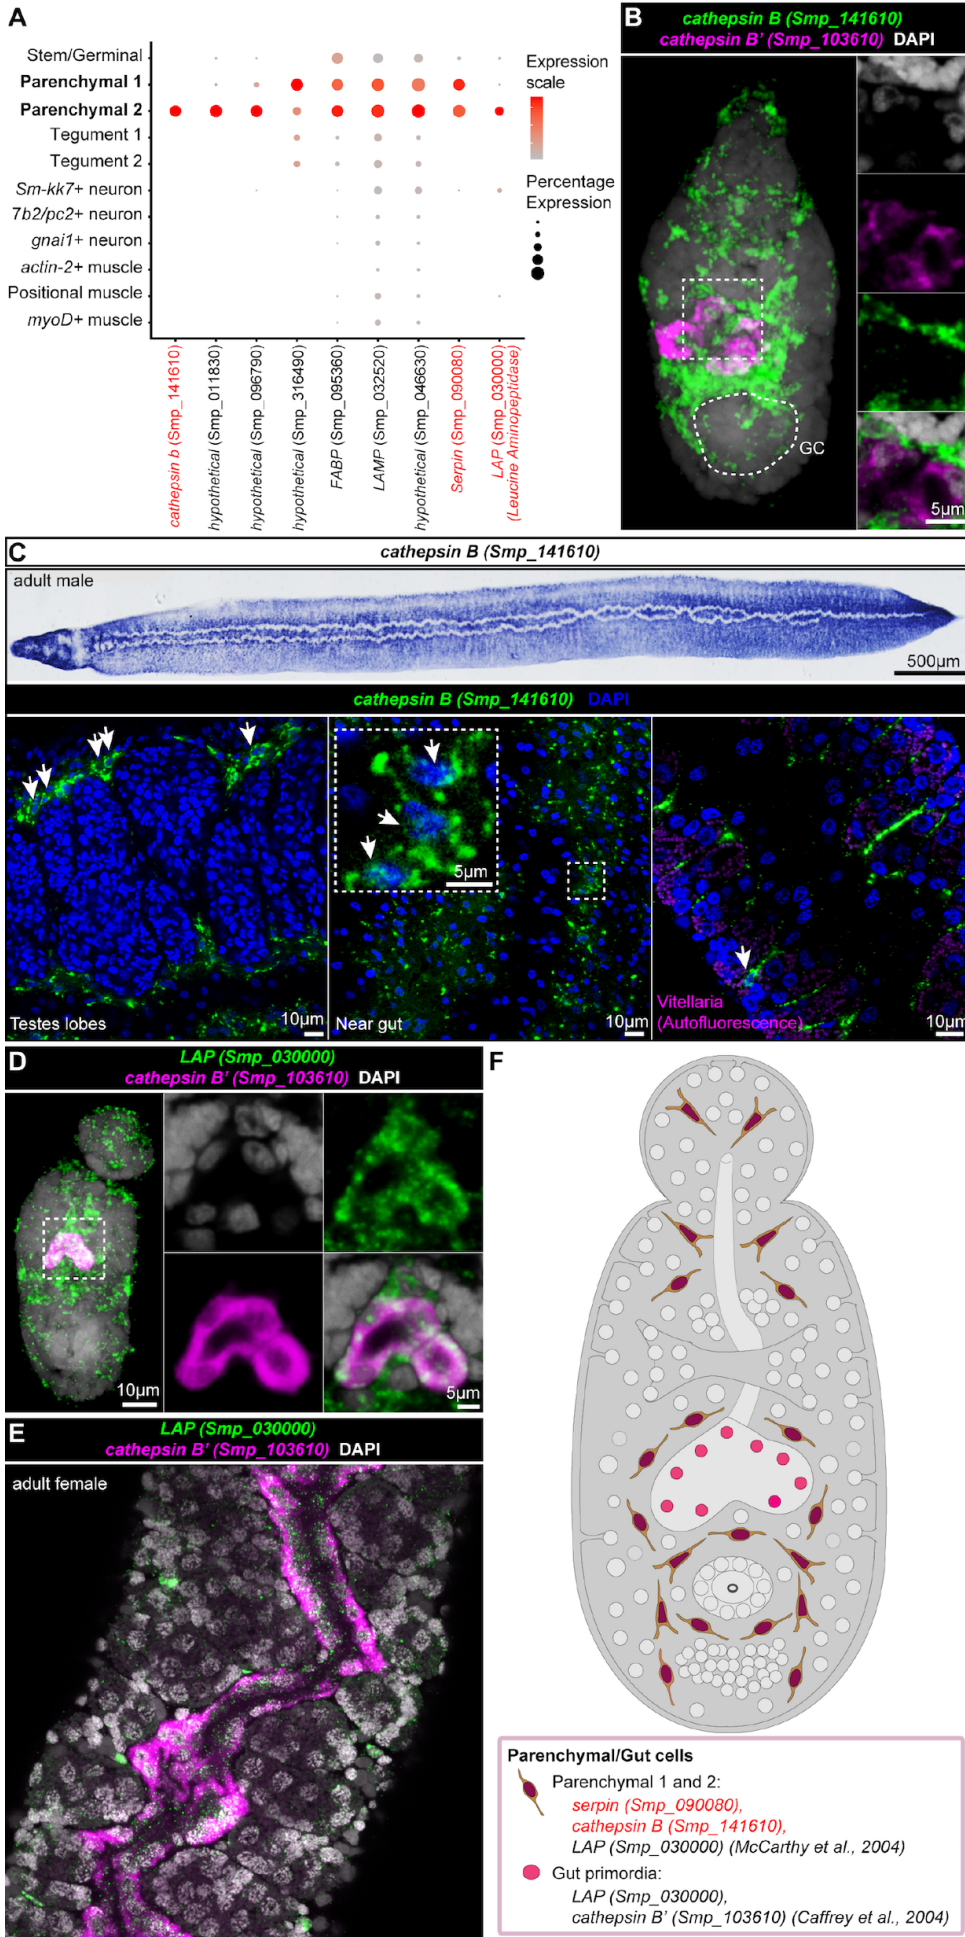

**Figure 4. Identification of schistosome parenchymal and primordial gut cells.**

(A) Expression profiles of cell marker genes that are specific or enriched in the parenchymal clusters. Genes validated by ISH are marked in red. (B) Double FISH of parenchymal *cathepsin B* (Smp\_141610) with a known marker of differentiated gut, *cathepsin B'* (Smp\_103610). No expression of parenchymal *cathepsin B* is observed in the primordial gut. GC: germinal cell cluster. (C) WISH (top) and FISH (bottom) of parenchymal *cathepsin B* in adult males. White arrowheads indicate positive cells in the bottom part of the figure. Single confocal sections shown for FISH. (D-E) *lap* (Smp\_030000) is expressed in both parenchyma and in the (D) gut primordia as well as (E) adult gut, shown by double FISH with the gut *cathepsin B* (Smp\_103610). (F) Schematic that summarises the parenchymal cell populations in 2-day schistosomula. Marker genes identified in the current study are indicated in red. All previously reported genes are shown in black.

## Figure 5

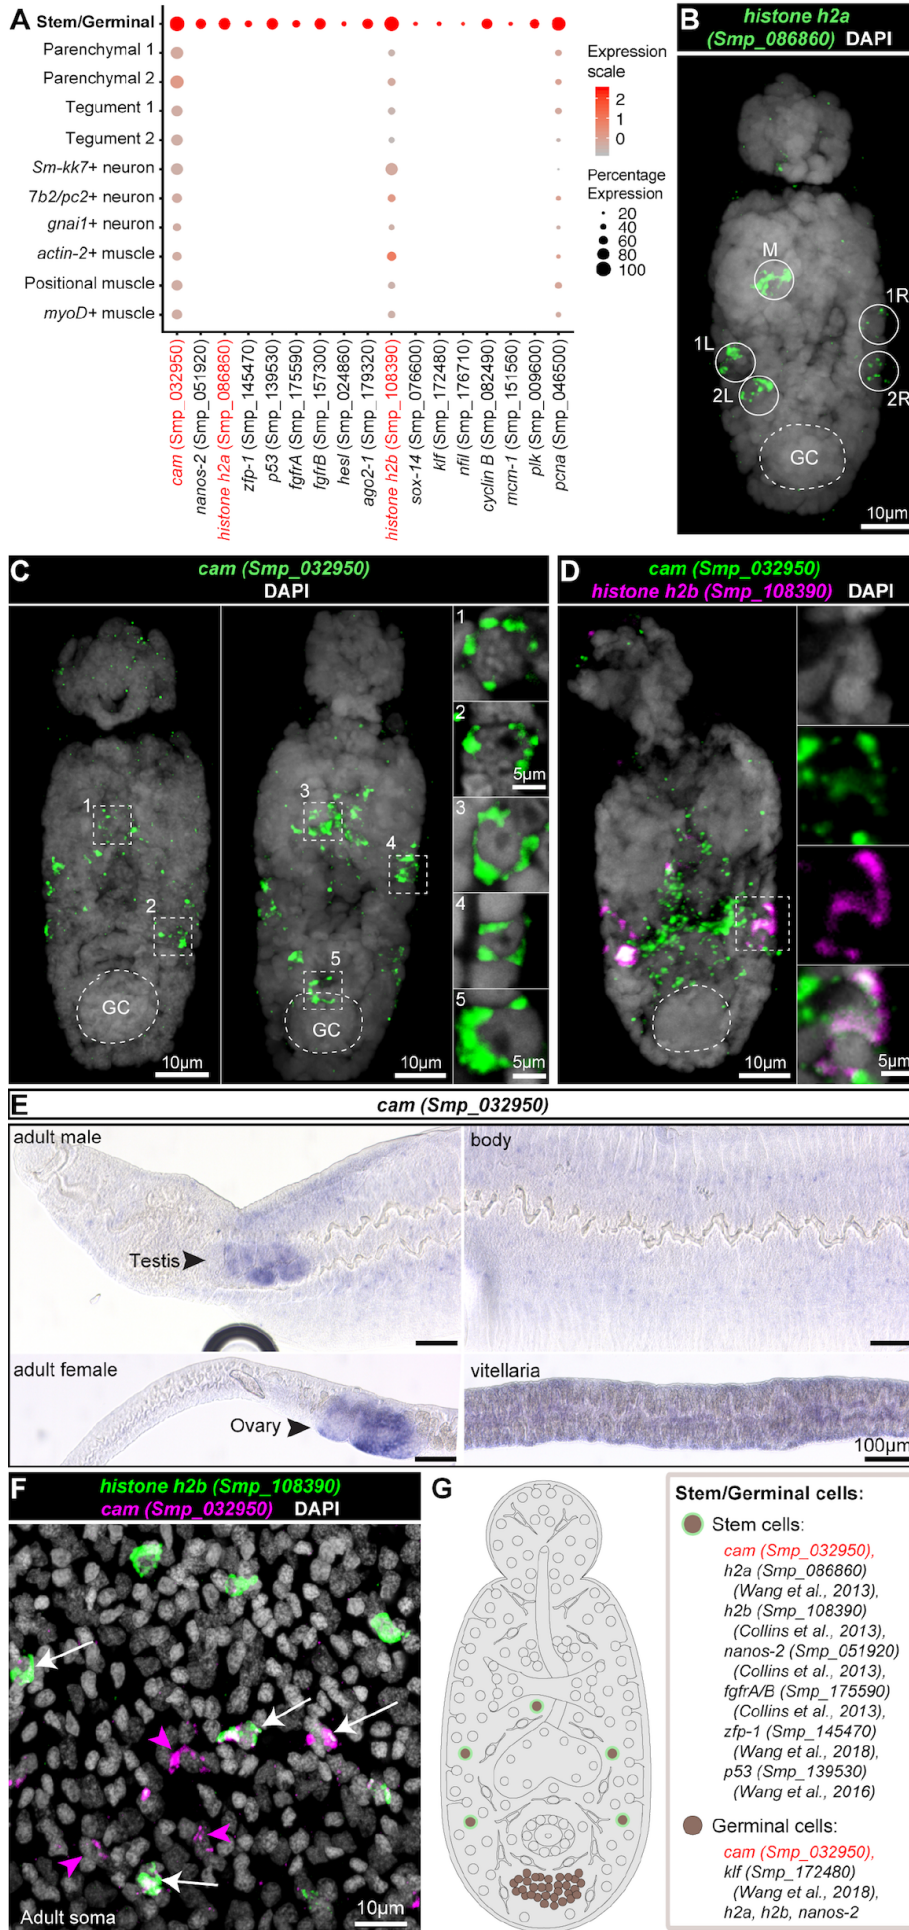

## Figure 5. A single cluster of stem cells in 2-day old schistosomula.

(A) Expression profiles of cell marker genes that are specific or enriched in the stem/germinal cell cluster. Genes validated by ISH are marked in red. (B) FISH of *h2a* (Smp\_086860) shows ~5 stem cells located at distinct locations – 1 medial cell (M) and 2 lateral cells on each side (1L and 2L, 1R and 2R; L: left; R: right). (C) FISH of *calmodulin* (Smp\_032950) shows a similar localisation pattern as *h2a*, with some worms with a few more *cam*<sup>+</sup> cells in the medial region as well as in the germinal cluster region. GC: germinal cluster (D) Double FISH of *calmodulin* (Smp\_032950) and a previously validated schistosome stem cell marker *h2b* (Smp\_108390). (B-D) MIP is shown for the whole worms, and magnified single confocal sections are shown for the dotted box area. (E) WISH of *calmodulin* (Smp\_032950) in adult parasites shows enriched expression in the gonads including testis, ovary, and vitellarium, as well as in the mid-animal body region. (F) Double FISH of *calmodulin* and *h2b* in adult soma. A single confocal section is shown. White arrows indicate co-localisation of two genes and magenta arrows indicate expression of only one gene. (G) Schematic that summarises the stem and germinal cell populations in 2-day schistosomula. Marker genes identified in the current study are indicated in red. All previously reported genes are shown in black.

Figure 6

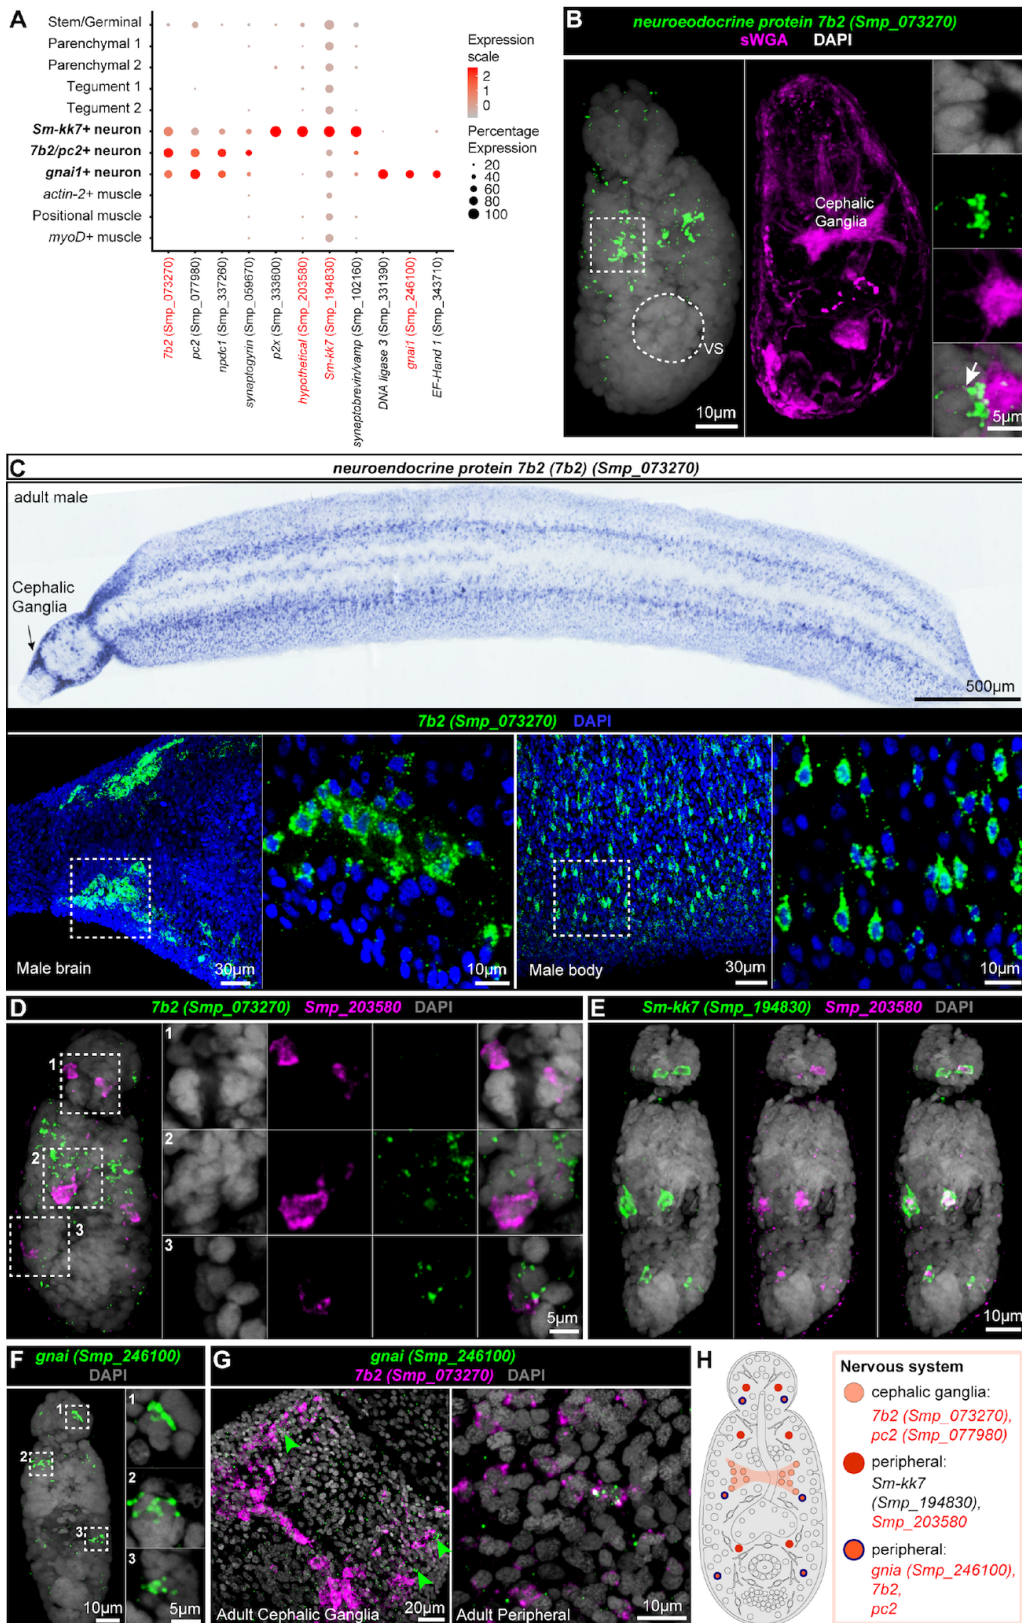

**Figure 6. Heterogeneity in cells of schistosomula nervous system.**

(A) Expression profiles of cell marker genes that are specific or enriched in the neuronal clusters. Genes validated by ISH are marked in red. (B) Cephalic ganglia marked by sWGA lectin shows co-localisation with *7b2* (Smp\_073270). White arrows indicate co-localisation of gene- sWGA lectin (C) WISH (top) and FISH (bottom) of *7b2* (Smp\_073270) in adults. Single confocal sections are shown for FISH. (D) Double FISH of *7b2* (Smp\_073270) and Smp\_203580 shows that six cells that are Smp\_203580+ (in magenta) do not co-localise with *7b2*+ cells (in green). (E) Double FISH of Smp\_203580 with *Sm-kk7* (Smp\_194830). All Smp\_203580+ cells co-localise with *Sm-kk7*. (F) *gnai1* (Smp\_246100) FISH shows expression in a few cells in the head and in the body region. (G) Double FISH of *gnai1* with *7b2* shows co-localisation in the peripheral neurons. Single confocal sections are shown. (H) Schematic that summarises the neuronal cell populations in two-day schistosomula. Marker genes identified in the current study are indicated in red. All previously reported genes are shown in black.

**Figure 7**

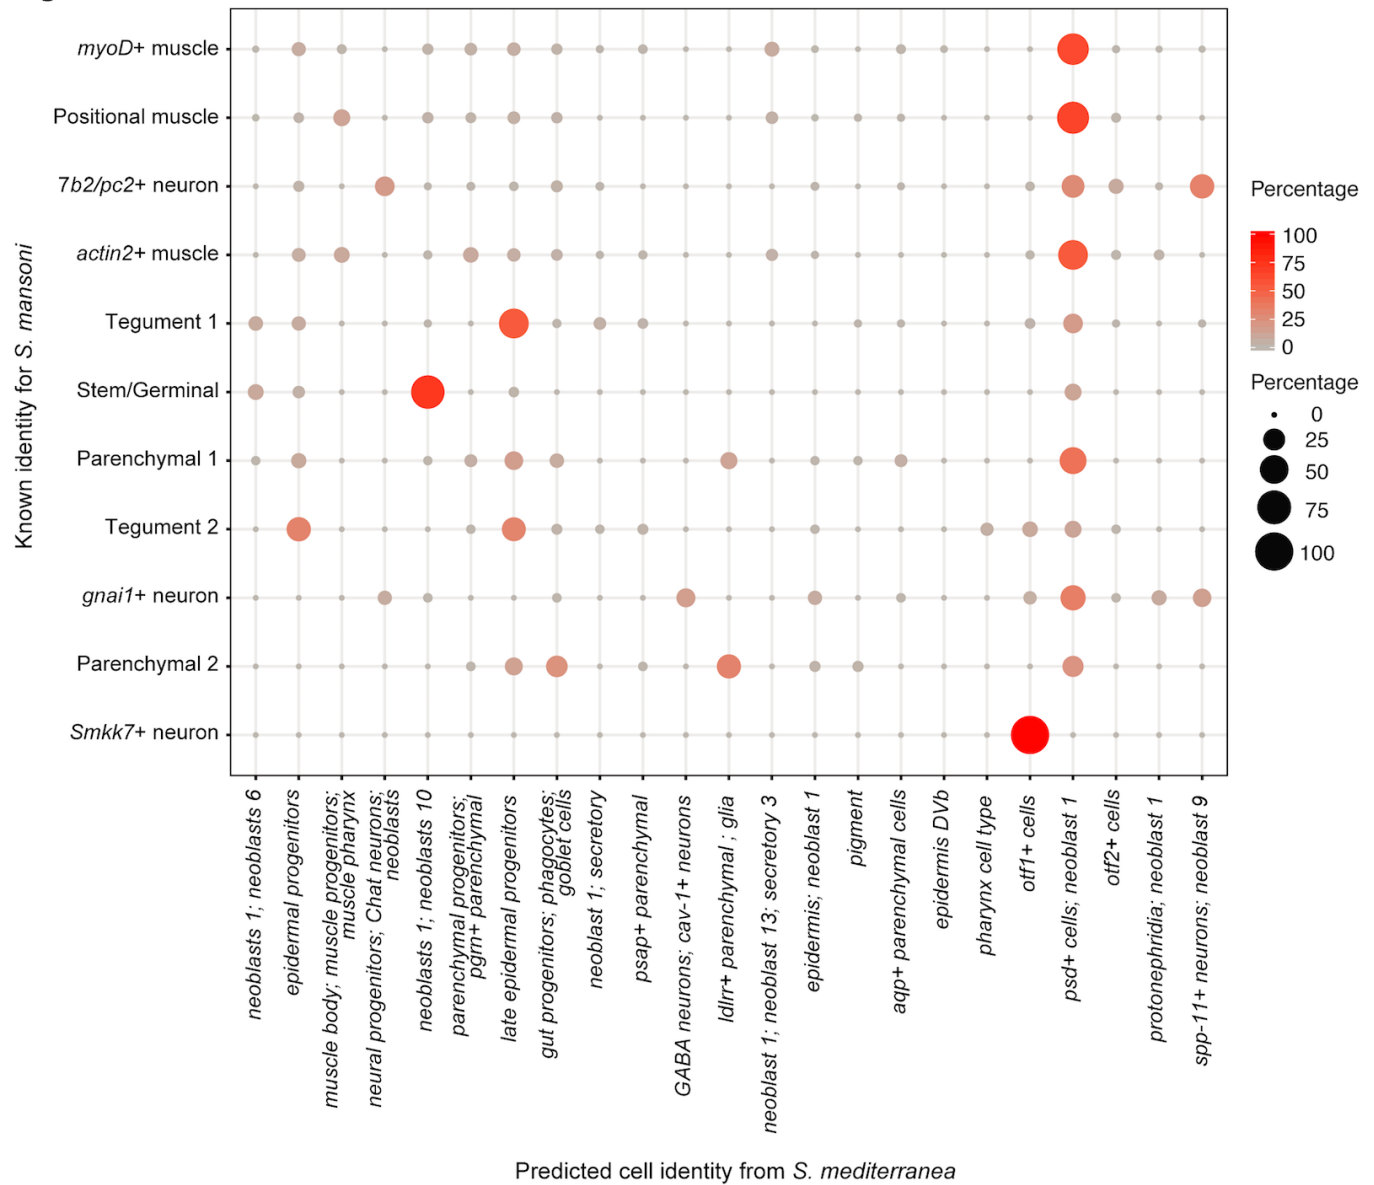

**Figure 7. Conserve gene expression patterns in stem cells and neurons between *S. mansoni* and *Schmidtea mediterranea*.** Dot plot showing the percentage of cells within each of the schistosomulum clusters (rows) that were mapped to *Schmidtea mediterranea* scRNA seq dataset<sup>31</sup> (columns) using a multiclass random forest classifier (RF). The colours and size of the circles represent the proportion of cells assigned to a particular label. Large circles in red represent 100% of cells. The small circles in light red represent 0% of cells.

## Supplementary Figure 1

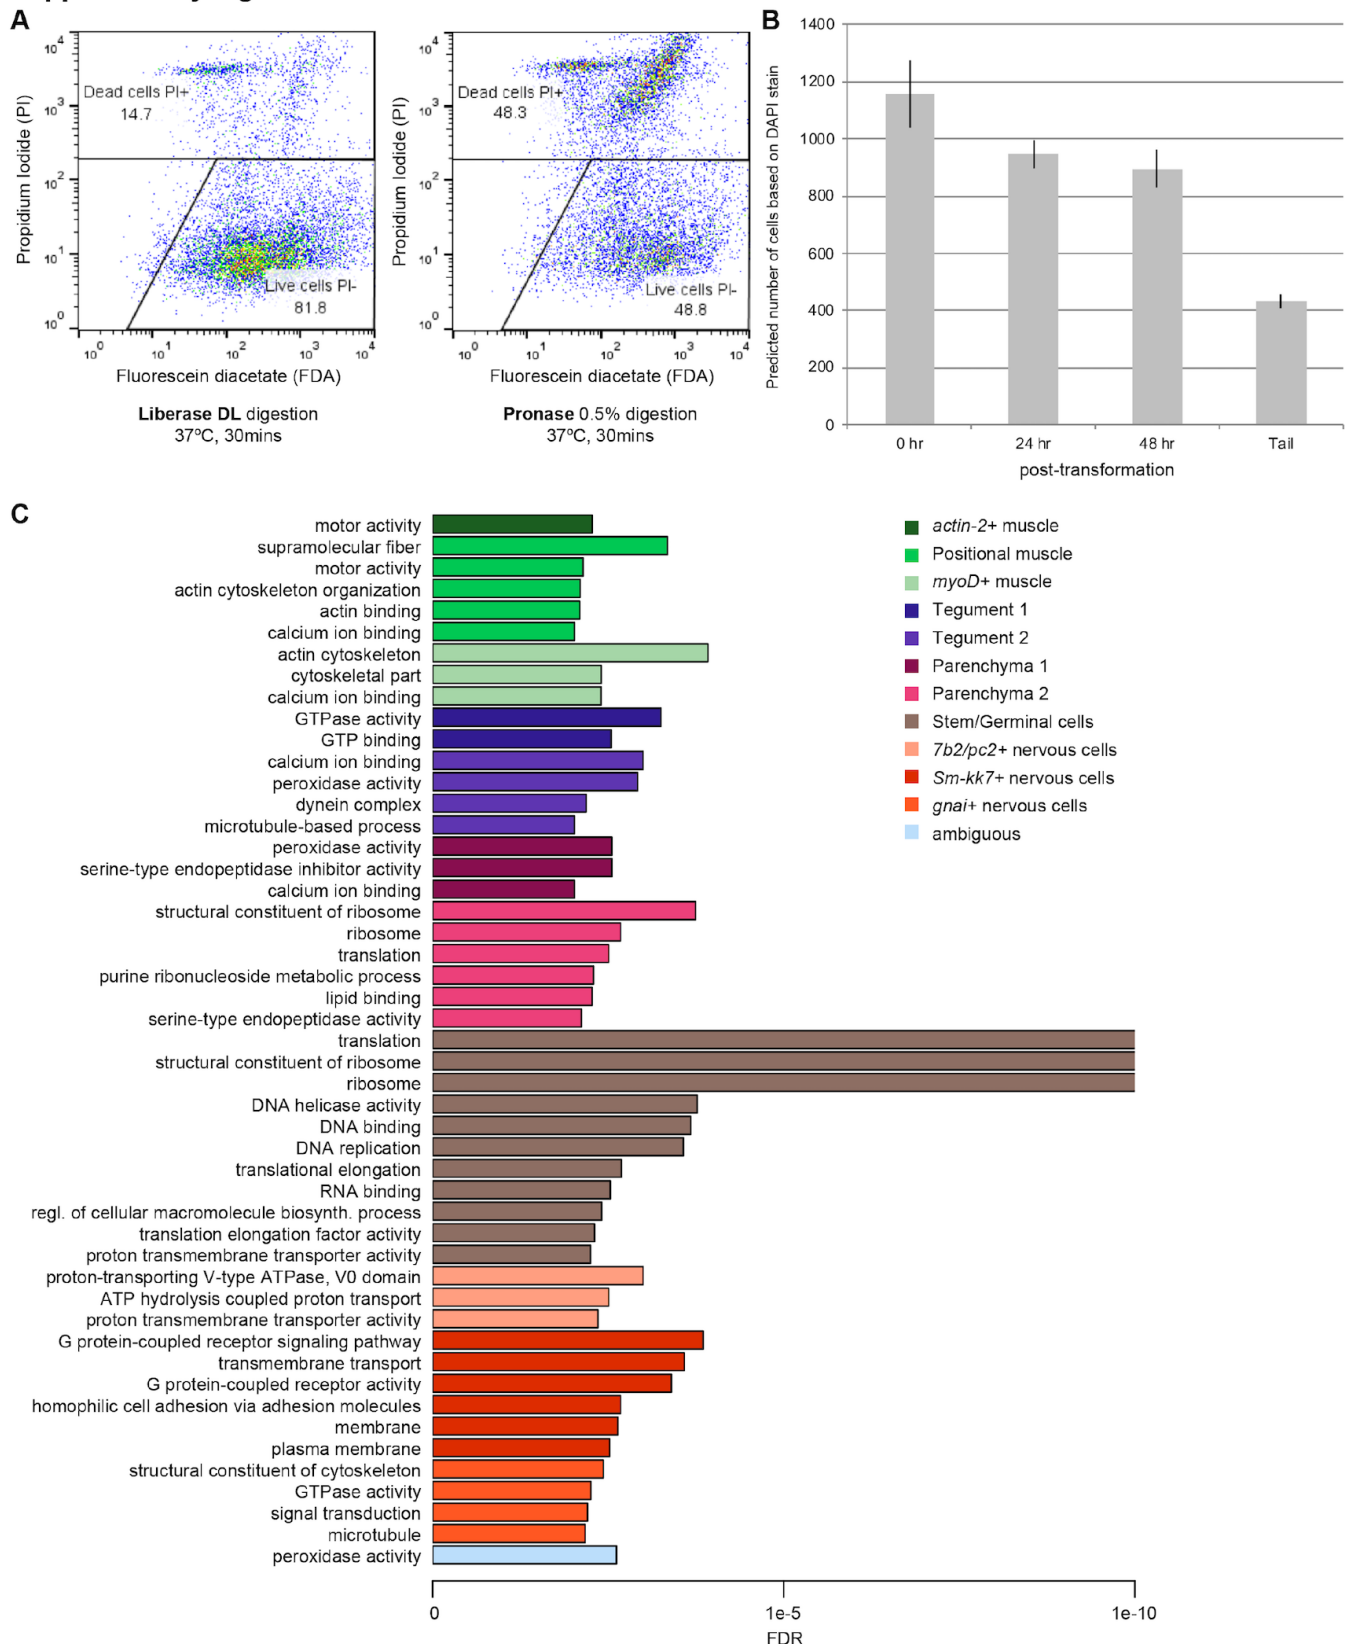

**Supplementary Figure 1.** (A) Comparison between protocols to dissociate schistosomula. Flow cytometry-based assessment of dissociation with either Liberase DL (750 $\mu$ l/ml) (left) or Pronase 0.5% (right) revealed that the former led to more live cells than the latter. (B) Predicted number of cells that comprises an *in vitro*-transformed schistosomulum. The bar chart shows the number of cells counted in schistosomula immediately after mechanical transformation (0 hr, i.e. cercaria head), after one day (24 hr) and two days (48 hrs) in culture. ‘Tail’ represents the number of cells counted in the tail detached from the cercaria during the mechanical transformation. Mean of number of cells counted in 3 schistosomula per timepoint (C) Significantly enriched GO terms for the marker genes in each cell cluster. Plot showing terms with FDR < 0.01 from a Fisher’s exact test and coloured by cell types. The x-axis indicates  $-\log_{10}$ FDR values, where an arbitrary maximum value of 10 was set.

Supplementary Figure 2

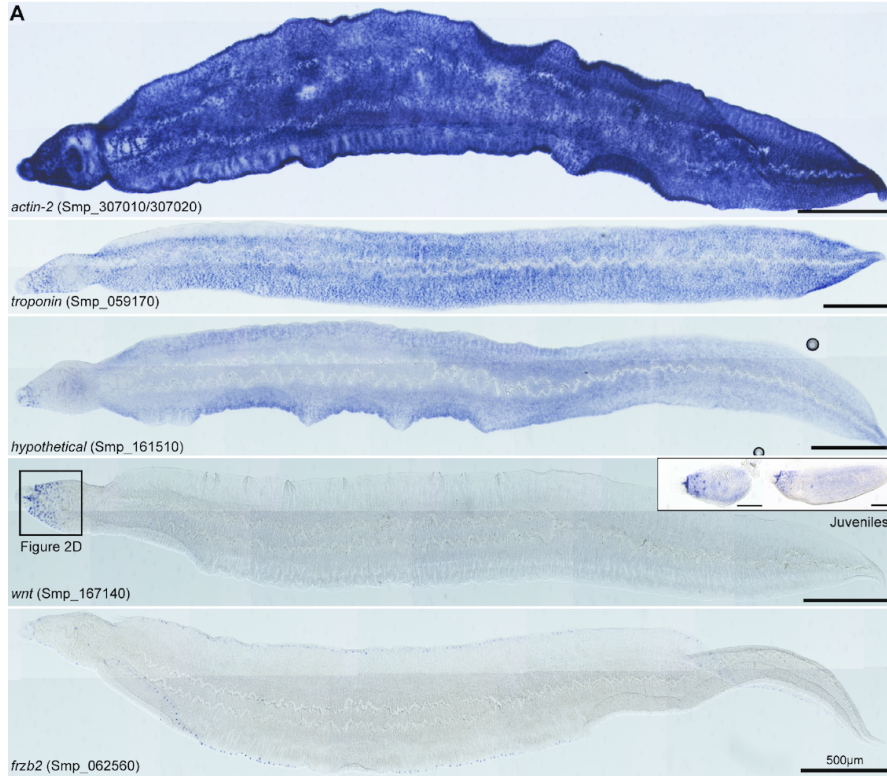

**Supplementary Figure 2.** (A) WISH of indicated markers and signalling molecules enriched in a subset of muscle cells in adult schistosomes. For *wnt*, the boxed region is shown in Figure 2D. On the right, WISH experiment shows that *wnt* expression is conserved in the anterior end of juvenile parasites collected from mice 3 weeks post-infection. (B) FISH of muscle markers in indicated regions of the adult worms. (C) Double FISH of selected muscle markers. White arrows: double positive cells; green arrowheads: single positive cells expressing genes indicated in green; magenta arrowhead: single positive cells expressing genes indicated in magenta. Magnified single confocal sections are shown for the dotted box area to the right of the image.

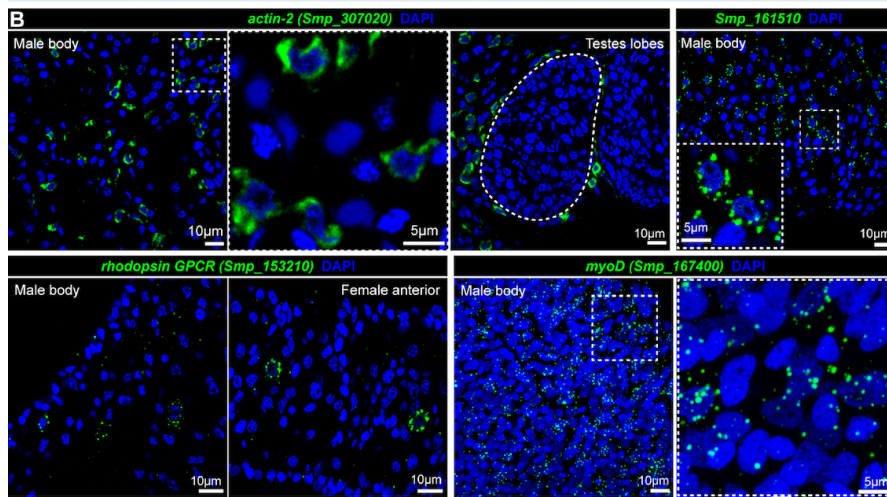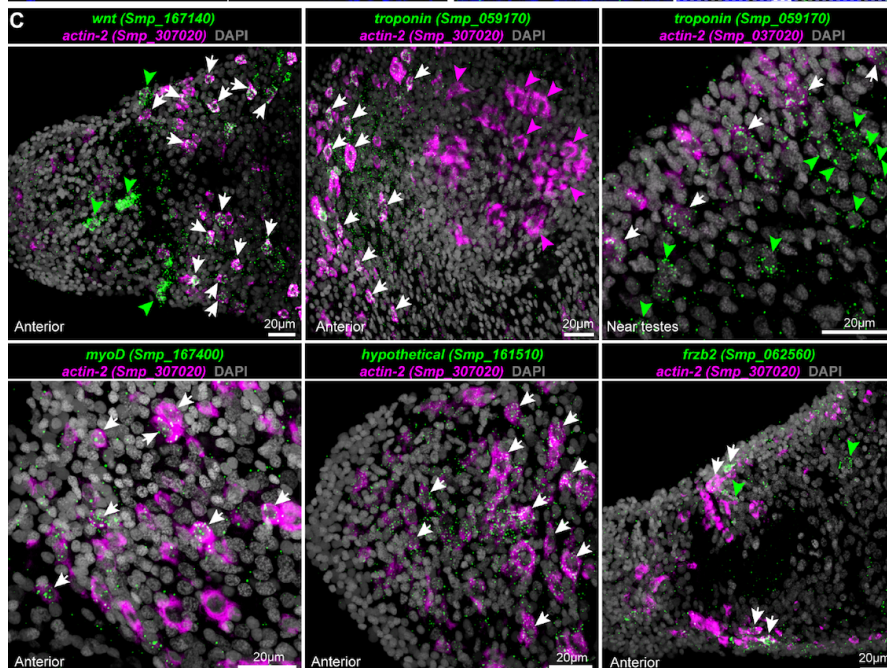

Supplementary Figure 3

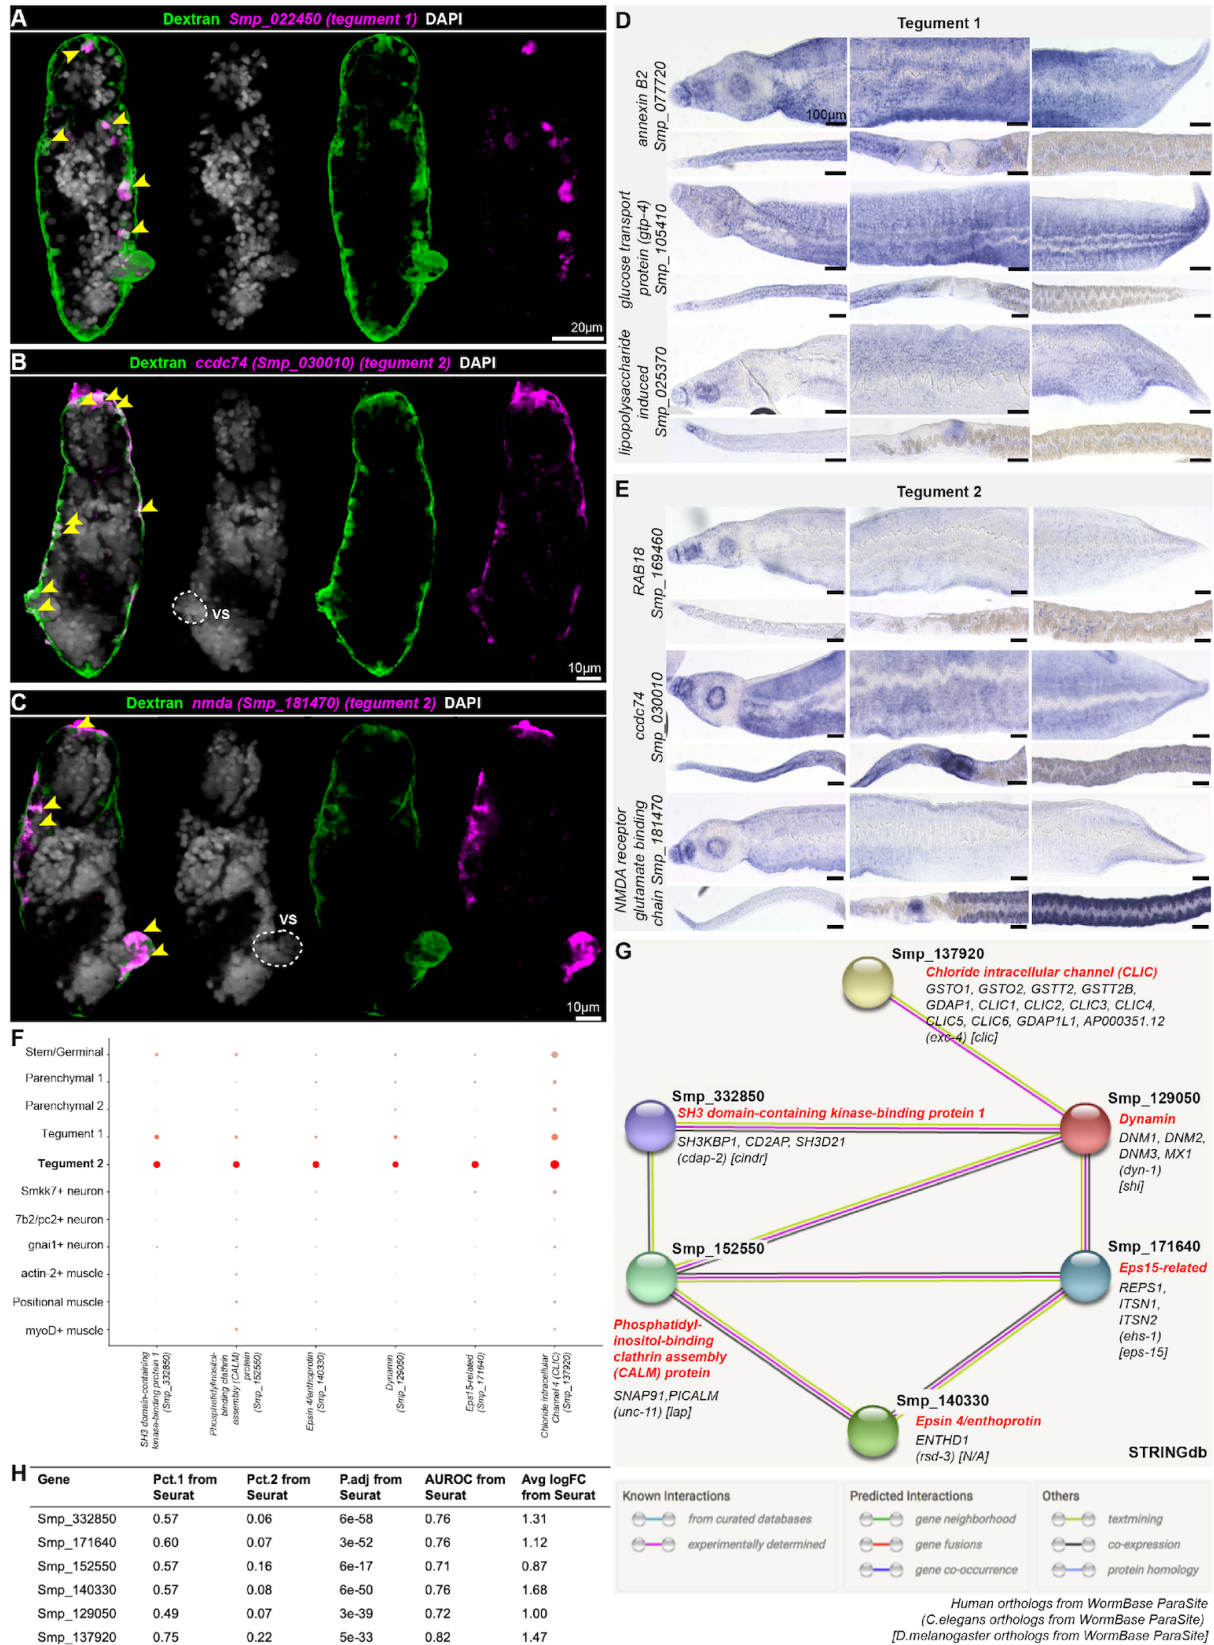

**Supplementary Figure 3.** (A-C) Dextran labelling in schistosomula shows co-localisation with Tegument 1 and 2 markers. Yellow arrowheads indicate cells positive for both dextran and tegument marker. VS: ventral sucker. (D-E) WISH of Tegument 1 and Tegument 2 marker genes in adult parasites. Scale bar: 100  $\mu$ m (F) Expression profile of tegument 2 marker genes used for STRINGdb analysis. (G-H) Prediction of biological processes enriched in Tegument 2 relative to Tegument 1. We identified genes that are strong markers (with AUROC  $\geq 0.7$  in Seurat) for Tegument 2 but not for Tegument 1. The set of genes shown is the largest connected component, i.e. set of predicted interacting genes in the STRINGdb results. The interaction cluster included several genes related to clathrin-mediated (receptor-mediated) endocytosis. These included phosphatidylinositol-binding clathrin assembly protein (CALM), Eps15-related, and epsin-related genes.

## Supplementary Figure 4

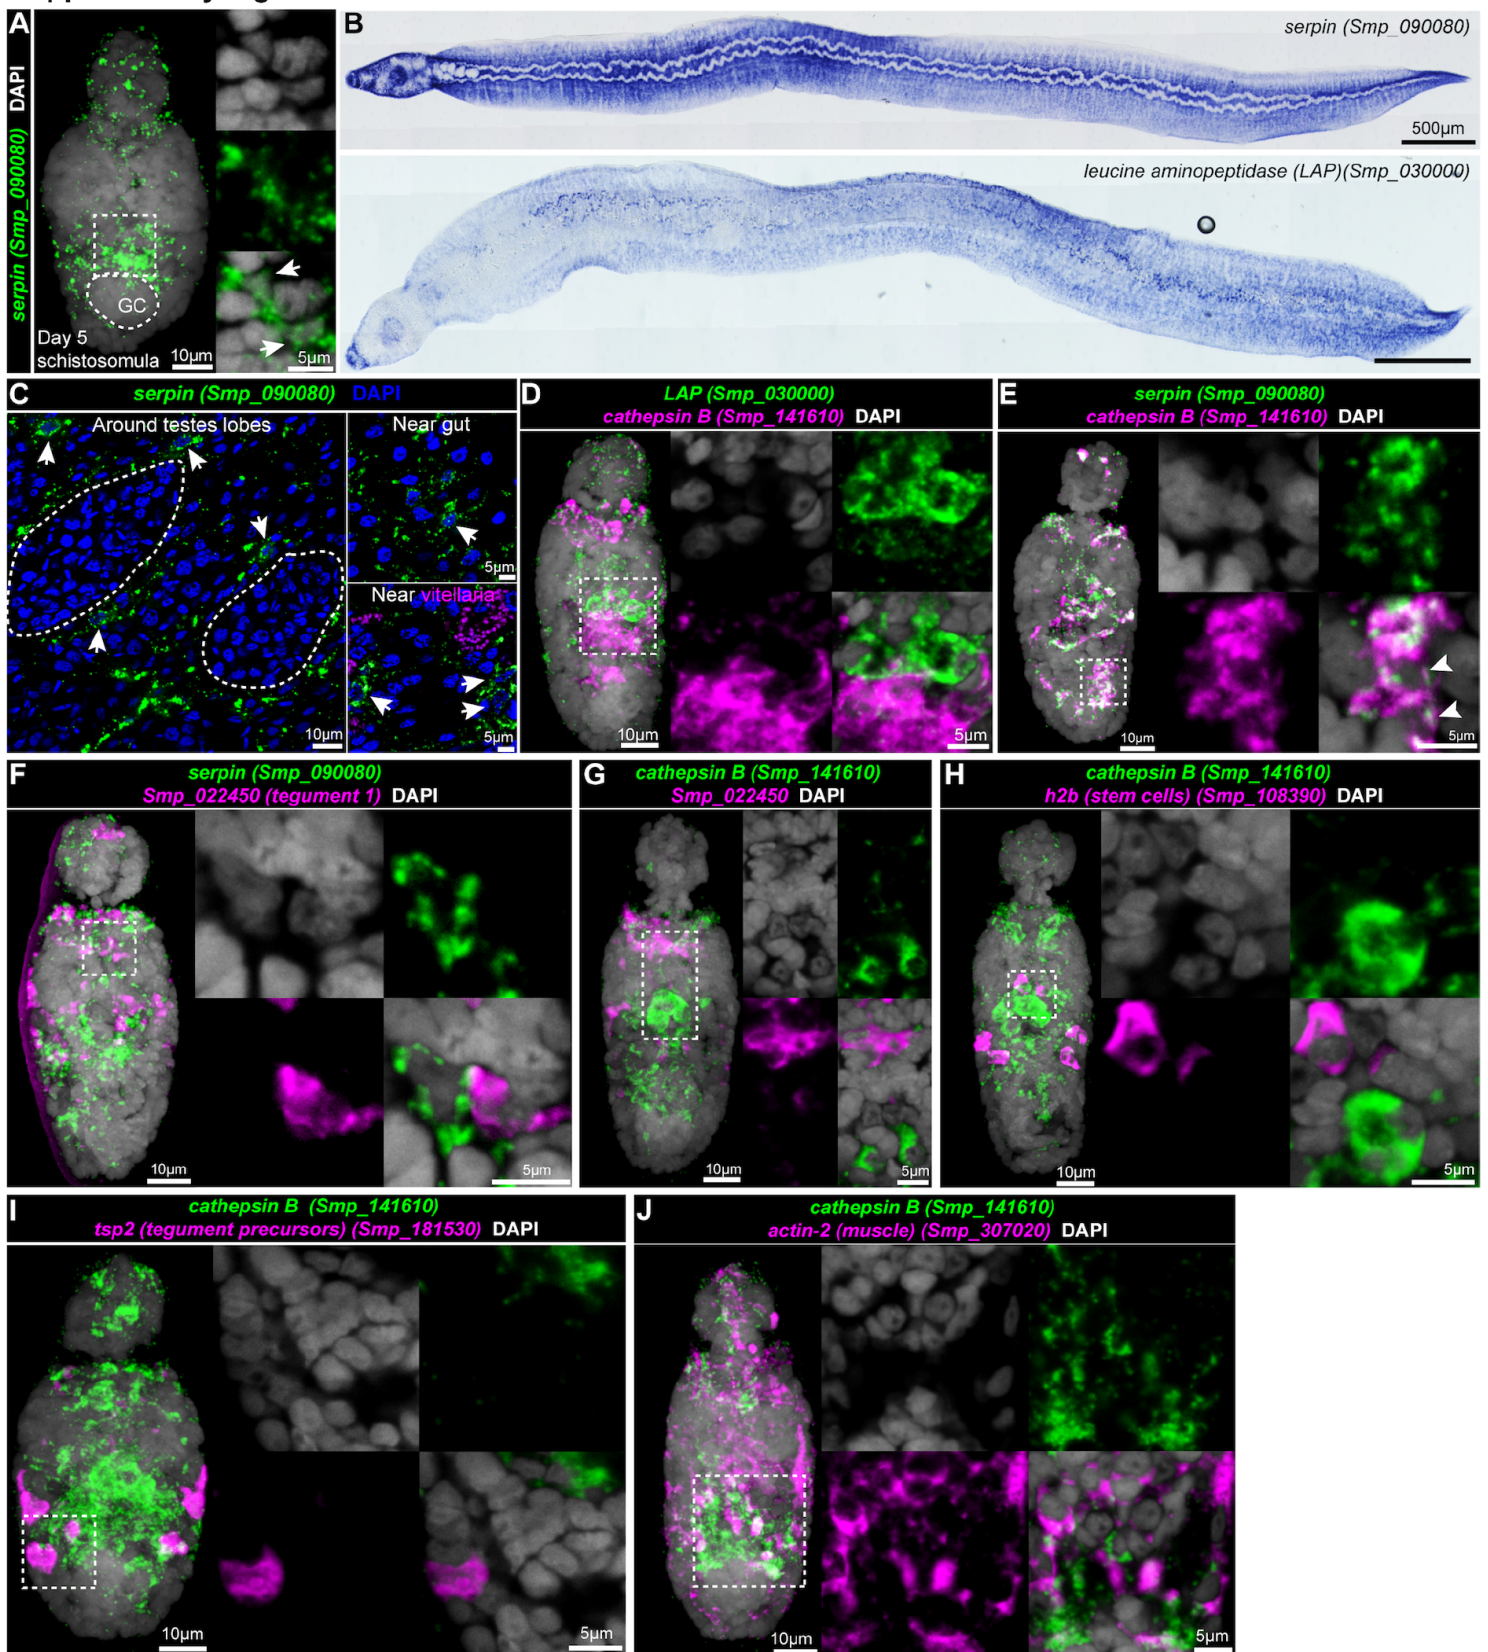

**Supplementary Figure 4.** (A) *serpin* FISH in five-day old schistosomula. MIP of whole worm is shown on the left, and single magnified confocal section from the dotted box is shown on the right. White arrows indicate a positive cell that has long cytoplasmic processes. (B) WISH of *serpin* and *lap* in adult parasites; *lap* is expressed in the worm parenchyma as well as in the gut. (C) Single confocal sections showing FISH of *serpin* in different regions of the worm. White arrows indicate single positive cells. (D-J) Double FISH of parenchymal cell markers and other indicated cell type markers in two-day old schistosomula. Parenchymal cell markers do not co-localise with the tegument cells (F-G), stem cells (H), or tegument precursors (I) but show some co-localisation with muscle cells (J). MIP is shown for the whole worm on the left, and single confocal sections from the dotted box are shown on the right.



## Supplementary Figure 5

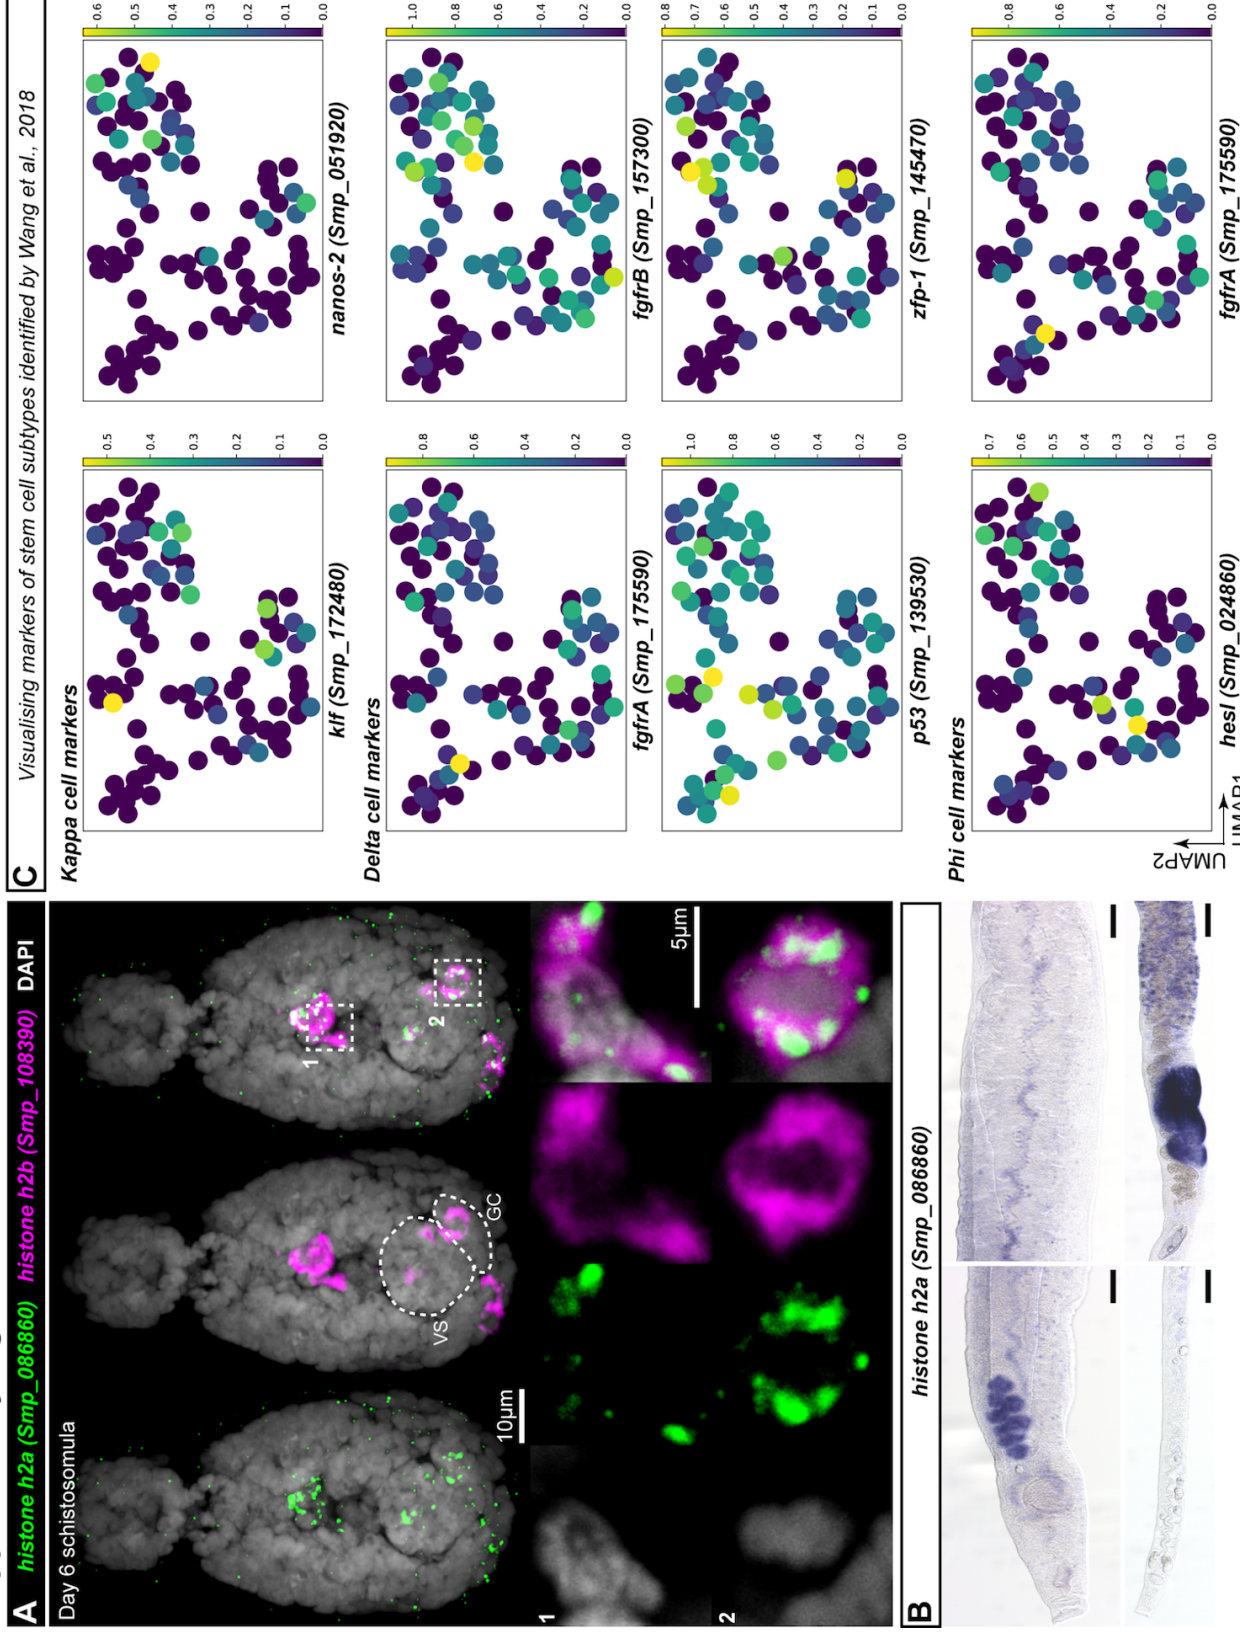

**Supplementary Figure 5.** (A) Double FISH of *h2a* identified in our dataset, and *h2b*, a known validated schistosome stem cell marker in six-day old schistosomula. *h2a*<sup>+</sup> cells co-express *h2b* in both the soma as well as in the germline cell cluster. Top: MIP for whole worm; Bottom: single confocal magnified sections from the dotted box regions. (B) WISH of *h2a* in adult parasites show expression in gonads and somatic cells, consistent with calmodulin and other previously characterised stem cell genes. (C) UMAP plots showing the expression of marker genes for three stem cell populations identified by Wang et al., 2018. Color scale of the UMAP plots ranges from yellow (high expression) to dark blue (no expression).

## Supplementary Figure 6

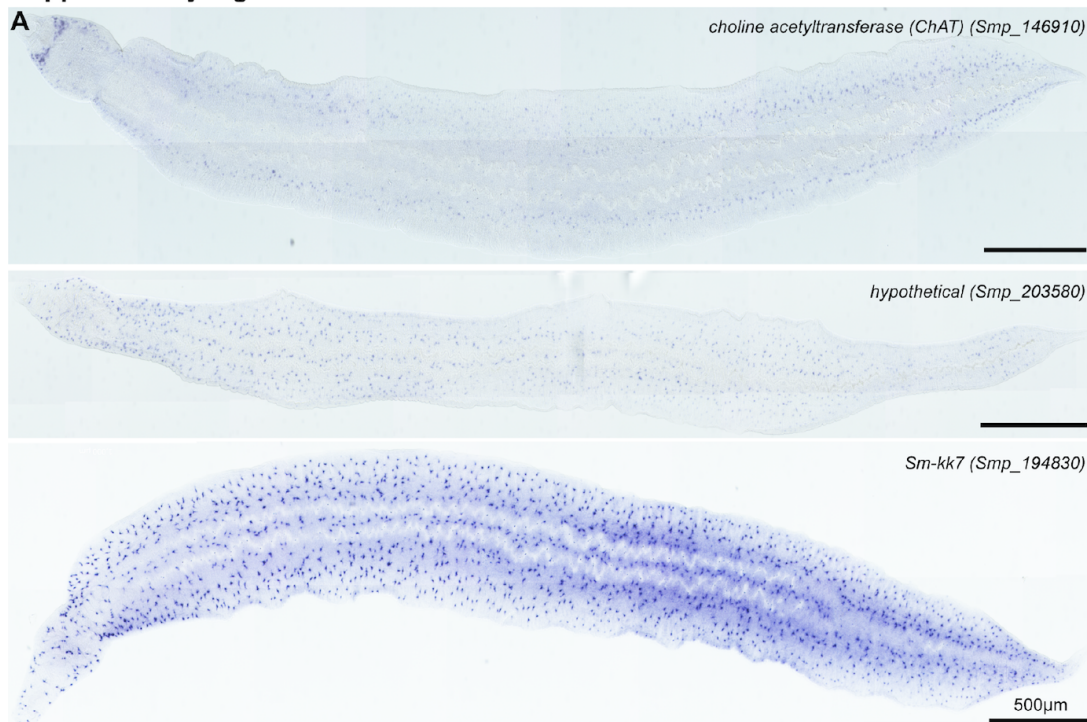

## Supplementary Figure 6.

(A) WISH of indicated neuronal markers in adult parasites. (B) FISH of *Smp\_203580* in adult male soma (mid-body) shows long cellular processes in each cell. (C-D) Double FISH in adults reveals that (C) *Smp\_203580* does not co-localise with pan-neuronal marker *7b2*, but (D) nearly all cells that express *Smp\_203580* co-express *Sm-kk7* (white signal). (E-F) *gnai* is expressed throughout the body of the adult worm (E), but does not co-localise with *Smp\_203580* (F). Green and magenta arrowheads indicate single positive cells for respectively labelled genes.

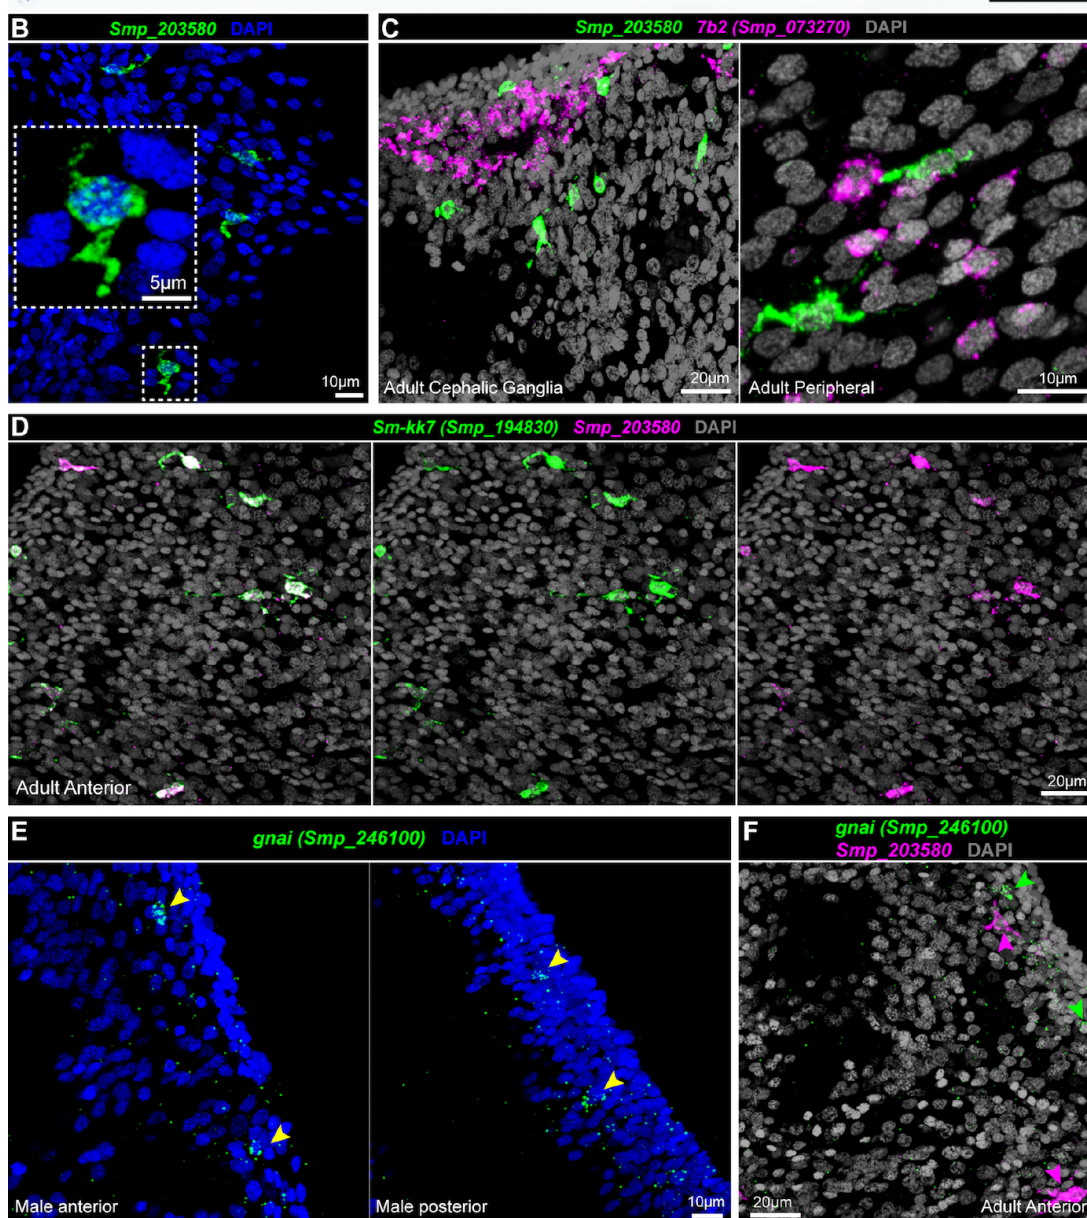

Source: https://www.biorxiv.org/content/biorxiv/early/2019/09/11/754713.full.pdf
